# Supplementary material for: Identification of catalytically important residues of the carotenoid 1,2-hydratases from Rubrivivax gelatinosus and Thiocapsa roseopersicina
Source: PubMed Central journal article supplement (PMC4717167; doi:10.1007/s00253-015-6998-y), 2015-10-19
Supplement: 253_2015_6998_MOESM1_ESM.pdf [file 253_2015_6998_MOESM1_ESM.pdf]

Electronic Supplementary Material for:

Applied Microbiology and Biotechnology

**Identification of catalytically important residues of the carotenoid  
1,2-hydratases from *Rubrivivax gelatinosus* and *Thiocapsa roseopersicina***

**Aida Hiseni, Linda G. Otten and Isabel W.C.E. Arends\***

Biocatalysis Group, Department of Biotechnology, Delft University of Technology, Delft, NL

\* Corresponding author: Prof. Dr. Isabel W.C.E. Arends, Biocatalysis Group, Department of Biotechnology, Delft University of Technology, Julianalaan 67, 2628 BC Delft, The Netherlands. Tel.: +31 15 2786659; Fax: +31 15 2781415; E-mail: I.W.C.E.Arends@tudelft.nl; URL: [www.bt.tudelft.nl/boc](http://www.bt.tudelft.nl/boc).

Contents

|                                                     |             |
|-----------------------------------------------------|-------------|
| <b>1. Importance of the N-terminal part of CrtC</b> | <b>p.24</b> |
| <b>2. Homology model of CrtC</b>                    | <b>p.26</b> |
| <b>Table S1</b>                                     | <b>p.24</b> |
| <b>Figure S1</b>                                    | <b>p.2</b>  |
| <b>Figure S2</b>                                    | <b>p.25</b> |
| <b>Figure S3</b>                                    | <b>p.26</b> |
| <b>Figure S4</b>                                    | <b>p.27</b> |
| <b>Figure S5</b>                                    | <b>p.28</b> |

**Figure S1.** Multiple sequence alignment of all CrtC protein sequences showing conserved amino acids. Identical amino acids are marked with an asterisk. *RgCrtC* sequence is highlighted in yellow (next page).







```

gi|495340016|ref|WP_008064750.1|-----FS 2
gi|517223140|ref|WP_018411958.1|-----ARRFD 5
gi|889919304|ref|WP_048861895.1|-----FS 2
gi|496441596|ref|WP_009150441.1|DGVFQSTGTHQAAGPVSGGRPPPTGTAEGDPIRPSDSADRARCPAFD 77
gi|146409846|gb|ABQ38352.1|_10|DGVVPAPGGADETAGTLHSRCGRASGARADGGAVGFDGSRAGDSGPRFD 91
gi|908659074|ref|WP_049795525.1|-----
gi|365289544|emb|CCD93979.1|_1|DGVVPAAGCADEAGRALRGGGRASGTGRADGSAVGPDGSRTGDSGPRFD 91
gi|41018902|gb|AAR98493.1|_10|DGIIPAAGRADEAARALRGGGRPSGTGRPDGGLVGPDGRRQDLRPRFD 91
gi|653027709|ref|WP_027279528.1|-----FN 2
gi|499791021|ref|WP_011471755.1|-----FN 2
gi|499823412|ref|WP_011504146.1|-----FN 2
gi|499762149|ref|WP_011442883.1|-----FN 2
gi|829076993|ref|WP_047310044.1|-----FN 2
gi|503269006|ref|WP_013503667.1|-----FN 2
gi|499470438|ref|WP_011157078.1|-----FN 2
gi|501486651|ref|WP_012495141.1|-----FN 2
gi|550975051|ref|WP_022723265.1|-----FN 2
gi|764538658|ref|WP_044412067.1|-----FN 2
gi|754113006|ref|WP_041748751.1|-----MGGSPARGPDFS 13
gi|737680904|ref|WP_035649991.1|-----DRGPDFS 7
gi|503405597|ref|WP_013640258.1|-----RFD 3
gi|657196689|ref|WP_029312388.1|-----RFD 3
gi|703385326|ref|WP_033417843.1|-----
gi|653032131|ref|WP_027283892.1|-----FD 2
gi|378403832|emb|CCG08948.1|_1|ERLLFSDGERDGAAGPVRGGRPSGAGSDGGALGPAGTGGPAGDLM 82
gi|754176764|ref|WP_041795395.1|VGDLRPAGGENGDARPLSGGQRPSGTGGADGGLIGTVGGGPGGSGGPDFA 89
gi|25989732|gb|AAN75036.1|_12|-----
gi|860504149|ref|WP_048445338.1|-----
gi|860474721|ref|WP_048434413.1|-----
gi|501291381|ref|WP_012333472.1|-----
gi|860453591|ref|WP_048427078.1|-----
gi|860560381|ref|WP_048464709.1|-----
gi|860527577|ref|WP_048454269.1|-----
gi|760871815|dbj|BAQ48812.1|_1|-----PRFD 4
gi|373567336|gb|EHP93308.1|_6|-----
gi|24009448|gb|ACS40674.1|_4|-----
gi|218523206|gb|ACK83791.1|_4|-----
gi|254269168|emb|CAX25134.1|_4|-----
gi|163663749|gb|ABY31116.1|_2|-----
gi|494837541|ref|WP_007563641.1|-----
gi|914802769|ref|WP_050733395.1|-----
gi|657246165|ref|WP_029357447.1|-----
gi|501276758|ref|WP_012319776.1|-----
gi|640229117|ref|WP_024829694.1|-----
gi|518936109|ref|WP_020091984.1|-----
gi|760075276|ref|WP_043757989.1|-----

```

```

gi | 759662308 | ref | WP_043379914. | -----
gi | 498368472 | ref | WP_010682628. | -----
gi | 497224411 | ref | WP_009538673. | -----
gi | 589291345 | gb | AHK79488.1 | _12
gi | 644125233 | ref | WP_025281955. | -----
gi | 496218797 | ref | WP_008932834. | -----
gi | 495659402 | ref | WP_008383981. | -----
gi | 687960265 | gb | KGE05197.1 | _16
gi | 496312569 | ref | WP_009021747. | -----
gi | 495571757 | ref | WP_008296336. | -----
gi | 908380581 | ref | WP_049751705. | -----
gi | 658524263 | ref | WP_029718812. | -----
gi | 332109922 | gb | FGJ10550.1 | _1-
gi | 760103377 | ref | WP_043785587. | -----
gi | 760129436 | ref | WP_043810804. | -----
gi | 7416798 | gb | BAA94047.1 | _1-4
gi | 75345570 | sp | p95619.1 | CRTC_R
gi | 913634290 | gb | KNZ32951.1 | _1-
gi | 809277751 | ref | WP_046331236. | -----
gi | 518258896 | ref | WP_019429104. | -----
gi | 518255752 | ref | WP_019425960. | -----
gi | 918152310 | gb | KOF08324.1 | _1-
gi | 61653243 | gb | AAX48196.1 | _1-2

VSVPRGYAWWYVDALSDDGKHGLTLIAFVGSVFSPIYFRGRRGL--- 146
--VGPFGYAWWYVDALSDDGKHGLTLIAFVGSVFSPIYFRGRRGL--- 44
-----MDALSDDGKHGLTLIAFVGSVFSPIYFKGRRRNK--- 34
-----MDALSDDGKHGLTLIAFVGSVFSPIYFKGRRRGR--- 34
IDVPPRGYAWWYVDALSDDGKHGLTLIAFVGSVFSPIYFKGHRGK--- 51
IDVPPRGYAWWYVDALSDDGKHGLTLIAFVGSVFSPIYFKGHRGK--- 51
RTIPSGYSWWYIDALSDDGKHGLTLIAFVGSVFSPIYAWARRKGG--T 92
--MPGSGYSWWYIDALSDDGKHGLTLIAFVGSVFSPIYAWARRKGG--T 45
RQIPRSGYSWWYIDALSDDGKHGLTLIAFVGSVFSPIYAWARRRGGG--A 129
-----MSDDGKHGLTLIAFVGSVFSPIYAWARRRGR--- 31
RKVPRDGYAWWYVDALSDDGKHGLTLIAFVGSVFSPIYAWARRRGE--- 48
-----MSDDGKHGLTLIAFVGSVFSPIYAWARRRGR--- 31
VHVAANGYAWWYIDATSDAGKHGLTLIAFVGSVFSPIYKLSGR--- 47
VAVAPNGYAWWYIDATSDAGKHGLTLIAFVGSVFSPIYKLSGR--- 47
-----MSADGKHGLTLIAFVGSVFSPIYAWMSGR--- 28
ETVEPNGYAWWYVDASFADHKYGLTLIAFVGSVFSPIYAKERRRAI--- 119
-----MSDDGKHGLTLIAFVGSVFSPIYAWARARET--- 31
-----MSDDGKHGLTLIAFVGSVFSPIYAWMSGW--- 28
LTVNDGYVWVYVDALSDDEQYGLTLIAMLGSVFSPIYAWMSRQ---GN 119
-----MSDDEQYGLTLIAMLGSVFSPIYAWMSRQ---GN 31
-----MSDDGKHGLTLIALIGSVFSPIYAWMSRQ---GQ 31

```







|                |                     |                      |     |                        |                   |     |
|----------------|---------------------|----------------------|-----|------------------------|-------------------|-----|
| gi   739596279 | ref   WP_037453842. | GDPLNHCTVNVVLTGAGGA  | --- | RWCMTBTRGRGKTRRDASSLTI | GFSSLN            | 77  |
| gi   764363842 | ref   WP_044336870. | GDPEHCAINVSLNGPRGS   | --- | AWAMTBRPSKRMRESADHF    | FAVGFSGMH         | 93  |
| gi   644239143 | ref   WP_025293539. | QRPEHCAINVSLNGPRGS   | --- | AWAMTBRPSARVHF         | SADHFSVGFSGVR     | 93  |
| gi   503035479 | ref   WP_013270455. | GAPENHCALNVAFYGPDCQ  | --- | RWTMTBRPAGQVEREARHI    | QIGFSSLS          | 74  |
| gi   617472745 | gb KAI93218.1 _2-   | VDPAQHCSINVAVYGRGAA  | --- | RWAMTECRHALGATPEQLA    | IGFSSLS           | 165 |
| gi   737603811 | ref   WP_035574467. | VPAENHVALNVALYGPRG   | --- | AWAMTBRGAGALARERADRF   | VVVPSSLT          | 76  |
| gi   648530966 | ref   WP_026222717. | ADPFNHCANVVALYGPRGA  | --- | RWAMTBRGRKSLKFRDVL     | LLIGFSSLE         | 74  |
| gi   288897641 | gb ADC63477.1 _28   | ADPLDHCALNVALYGRRGK  | --- | RWAMTBRGRAALQRDR       | TNLVIGPSSHVH      | 165 |
| gi   760114352 | ref   WP_043796307. | ADPLDHCALNVALYGRRGK  | --- | RWAMTBRGRAALQRDR       | TNLVIGPSSHVH      | 77  |
| gi   494098690 | ref   WP_007039487. | ADPLDHCALNVALYGRNGK  | --- | RWAMTBRGRTSLHRTGDS     | LTIIGFSSALA       | 77  |
| gi   75388571  | sp Q7X3G5.1 CRTC_T  | PDPLNHCAINVALYQKAGK  | --- | RWTMTBRGRKALRQAPGR     | LLDIGPSSHLT       | 166 |
| gi   390426908 | gb AFL73973.1 _35   | SDPLNHNSLNVALYQ-ACK  | --- | RWSMTBRGRSALRRDAS      | RRLEIGFSSALS      | 126 |
| gi   752807498 | ref   WP_041446922. | SDPLNHNSLNVALYQ-ACK  | --- | RWSMTBRGRSALRRDAS      | RRLEIGFSSALS      | 87  |
| gi   760074757 | ref   WP_043757486. | SDPLNHNSLNVALYQ-EVK  | --- | RWTMTBRGRSALRRDAS      | SLEIGFSSALS       | 95  |
| gi   918211006 | ref   WP_052348303. | SDPLNHNSLNVALYQ-EVK  | --- | RWTMTBRGRSALRRDAS      | SLEIGFSSALS       | 87  |
| gi   499982040 | ref   WP_011662758. | GDPLHHVSLNVALYQ-EGK  | --- | RWSMTBRGRSLODKT        | WLQIGFSSLE        | 96  |
| gi   493840365 | ref   WP_006787509. | LDPLNHCAINVALYGPNGK  | --- | RWALDTRGRSSVERGR       | DFLRIGFSQLC       | 80  |
| gi   653037601 | ref   WP_027289289. | ADPLNHCSINVALYGEQPN  | --- | RWAMTBRGRTRIDR         | GARHFSVGFSGLH     | 103 |
| gi   519009821 | ref   WP_020165696. | ADPHAHCANVVALYGDK-R  | --- | RWTMTBRGASALQR         | DTHSLRIGFSRLH     | 99  |
| gi   518759539 | ref   WP_019916969. | ADPHAHCANVVALYGDK-R  | --- | RWTMTBRGASALQR         | DAHSLRIGFSRLH     | 95  |
| gi   495340016 | ref   WP_008064750. | ADPHAHCANVVALYGDK-R  | --- | RWAMTBRGASALQR         | DARNLRIGFSRLH     | 95  |
| gi   517223140 | ref   WP_018411958. | ADPHAHCANVVALYQDN-R  | --- | RWTMTBRGPQALQR         | DAQHLRIGFSLH      | 97  |
| gi   889919304 | ref   WP_048861895. | VDPERHCAVNVLYGERGR   | --- | RWTMTBRGASHLHRT        | ATSFALGPSTLA      | 94  |
| gi   496441596 | ref   WP_009150441. | ADPEHFCAINVAIVYASGK  | --- | RWAMTBRGRQLSR          | TPTELRIGFSQLH     | 169 |
| gi   146409846 | gb ABQ38352.1 _10   | ADPEDHCALNVALYGARAR  | --- | RWSMTBRGRGAI           | VRDAESFKIGFSRLA   | 183 |
| gi   908659074 | ref   WP_049795525. | ADPEDHCALNVALYGARAR  | --- | RWSMTBRGRGAI           | VRDAESFKIGFSRLA   | 90  |
| gi   365289544 | emb CCD93979.1 _1   | AEPENHCALNVALYKRRAR  | --- | RWSMTBRGRGAI           | ARDEARFAVGFSSLS   | 183 |
| gi   41018902  | gb AAR98493.1 _10-  | ADAENHCALNVALYGERAR  | --- | RWAMTBRGRGAI           | ARDEARFAVGFSSLA   | 183 |
| gi   653027709 | ref   WP_027279528. | VDPNMHCAINVALYRENGN  | --- | RWTMTBRGRGHVER         | SATQLSIGFSRVF     | 94  |
| gi   499791021 | ref   WP_011471755. | TDPLNHCAINVALYRNTGN  | --- | RWTMTBRGRRTVAF         | SAPSLVIGFSDLS     | 94  |
| gi   499823412 | ref   WP_011504146. | ADPLNHCAINVLGYHSAGK  | --- | RWTMTBRARGRVAR         | NLSLLIIGFSDLA     | 94  |
| gi   499762149 | ref   WP_011442883. | ADPLNHCAINVALYHSAGK  | --- | RWTMTBRGRVARNL         | HSLLIIGFSDLA      | 94  |
| gi   829076993 | ref   WP_047310044. | ADPLDHCALNVALYHQAGK  | --- | RWSMTBRGRGRVAR         | NVNAFLIGPDDL      | 94  |
| gi   503269006 | ref   WP_013503667. | ADPLDHCALNVALYHQAGK  | --- | RWSMTBRGRGRVAR         | NVNAFLIGPDDL      | 94  |
| gi   499470438 | ref   WP_011157078. | ADPLDHCALNVALYHEAGK  | --- | RWTMTBRGRGRVAR         | NANSFLIGPDDL      | 94  |
| gi   501486651 | ref   WP_012495141. | ADPLDHCALNVALYHEAGK  | --- | RWTMTBRGRGRVAR         | NANSFLIGPDDL      | 94  |
| gi   509975051 | ref   WP_022732365. | ADPLDHCALNVALYRPGGK  | --- | TWTMTBRGRGRVAR         | NVHSFLIGPDDL      | 94  |
| gi   764538658 | ref   WP_044412067. | ADPMNHCAINVALYRPGGN  | --- | RWTMTBRARGRVAR         | TVNALLVGPDDL      | 94  |
| gi   754113006 | ref   WP_041748751. | ADPLNHCAINVAIVYRSGGN | --- | RWAMTBRPRGAVG          | FTDTFTVGFPSRLC    | 105 |
| gi   737680904 | ref   WP_035649991. | ADPINHCAINVAIVYRSGGN | --- | RWAMTBRPEAVSR          | IDTFAVGFPSNLS     | 99  |
| gi   503405597 | ref   WP_013640258. | AAPEDFVAINALYRPGGN   | --- | RWTMTERRRHS            | LRAEADSLAIGFSRLA  | 97  |
| gi   657196689 | ref   WP_029312388. | ADPEYVAINALYRPRRT    | --- | LWAMTERRRRSL           | IREPGTLIGFSRLD    | 97  |
| gi   703385326 | ref   WP_033417843. | SEPLDHSAINLALYKSSH   | --- | RWAMTERRRRGS           | VLFAPDVLAIIGFSELR | 87  |
| gi   653032131 | ref   WP_027283892. | GDPMHCCLNVALYQ-RPR   | --- | RWAMTERRRRGAL          | ARGADFLQIGFSRLD   | 93  |
| gi   378403832 | emb CCG08948.1 _1   | -DPHDHVAINVALYQAPQG  | --- | WTMTBRGRRAL            | ARDTRLTIIGFSSALS  | 170 |
| gi   754176764 | ref   WP_041795395. | -DPHDHVAINVALYQAPQG  | --- | WTMTBRGRRAL            | ARDTRLTIIGFSSALS  | 86  |

```

gi | 25989732 | gb | AAN75036.1 | _1_2- | DPENHVAINVALYNRGG | ---RWAMTEGREALVERDDSTLAIGPSALR | 178
gi | 860504149 | ref | WP_048445338. | DPIDHSANVVLYGKPA | ---AWAMTERRRHSHVARDAASLAIGPSLSD | 86
gi | 860474721 | ref | WP_048434413. | DPIDHSANVVLYGRPK | ---AWAMTERRRARSKTATSLAIGPSALD | 86
gi | 501291381 | ref | WP_012333472. | DPLDHSANVVLYGAPA | ---RWAMTERRRSVARDAASLSIGPSSLA | 86
gi | 860453591 | ref | WP_048427078. | DPINHSAINVLYGRPK | ---AWAMTERRRHVNRATSLAIGPSLSD | 73
gi | 860560381 | ref | WP_048464709. | DPINHSANVVLYGRPK | ---AWAMTERRRHVSRTATSLAIGPSLSD | 73
gi | 860527577 | ref | WP_048454269. | DPINHSAINVLYGRPK | ---AWAMTERRRHVSRTATSLAIGPSLSD | 86
gi | 760871815 | db | BAQ48812.1 | _1_1 | DPINHSANVVLYGRPK | ---AWAMTERRRHVDRTATSLAIGPSLSD | 73
gi | 373567336 | gb | EHP93308.1 | _6- | DPFAHCAMNVLYGERGN | ---RFAMTEARNARSLRDATSFSLGPSLLE | 93
gi | 240009448 | gb | ACS40674.1 | _4- | DPFAHCAMNVLYGERGN | ---RFAMTEARNARSLRDATSFSLGPSLLE | 84
gi | 218523206 | gb | ACK83791.1 | _4- | DPFAHCAMNVLYGERGN | ---RFAMTEARNARSLRDATSFSLGPSLLE | 84
gi | 254269168 | emb | CAX25134.1 | _4 | DPFAHCAMNVLYGERGN | ---RFAMTEARNARSLRDATSFSLGPSLLE | 84
gi | 163663749 | gb | ABY31116.1 | _2- | DPFAHCAMNVLYGERGN | ---RFAMTEARNARSLRDATSFSLGPSLLE | 87
gi | 494837541 | ref | WP_007563641. | DPFAHCAMNVLYGDRT | ---RFAMTEGAAASLSQSRHSIAIGPSAMA | 73
gi | 914802769 | ref | WP_050733395. | DPFAHCAMNVLYGDRT | ---RFAMTEGAAASLSRSHSVAIGRSAMA | 73
gi | 657246165 | ref | WP_029357447. | DPFAHCAMNVLYGDRG | ---RFAMTEARRAASLSRSADHIAVGPSAMH | 73
gi | 501276758 | ref | WP_012319776. | DPFAHCAMNVLYGDRG | ---RFAMTEARRAASLSRSADHIAVGPSAMH | 73
gi | 640229117 | ref | WP_024829694. | DPFAHCAMNVLYGDRG | ---RFAMTEARRAASLSRSADHIAVGPSAMH | 73
gi | 518936109 | ref | WP_020091984. | DPFAHCAMNVLYGDRG | ---RFAMTEARRAASLSRSADHIAVGPSAMH | 73
gi | 760075276 | ref | WP_043757989. | DPFAHCAMNVLYGDRG | ---RFAMTEARRAASLSRSGPDHIAIGPSAMH | 73
gi | 759662308 | ref | WP_043379914. | DPFAHCAMNVLYGDRG | ---RFAMTEARRAASLSRSGPDHIAIGPSAMH | 73
gi | 498368472 | ref | WP_010682628. | DPFAHCAMNVLYGDRS | ---RFAMTEARRAASLSRSADHIAVGPSVMH | 73
gi | 497224411 | ref | WP_009538673. | TDPARHCCMNVLYGASAN | ---RWAMTEGAAASLARDAATTIRIGPSGLR | 86
gi | 589291345 | gb | AHK79488.1 | _1_2 | ---PNHHCALNVALYGDVGR | ---WAMTEGRGLARDSHNLIIGPSAMS | 131
gi | 644125233 | ref | WP_025281955. | ---PNHHCALNVALYGDVGR | ---WAMTEGRGLARDSHNLIIGPSAMS | 76
gi | 496218797 | ref | WP_008932834. | ---PDHHVAINVALYGNAPR | ---RWAMTEGRGLQDRDNLVIGPSALE | 90
gi | 495659402 | ref | WP_008383981. | VDPDFCSLNVALYGDGR | ---RWAMTEGRGALSRDASSLAIGPSALA | 80
gi | 687960265 | gb | KGE05197.1 | _1_16 | ---DPEQYCGFNAVLYNPKR | ---HWAMTEGRGDLIRDSEHLRARGSAIH | 91
gi | 496312569 | ref | WP_009021747. | QNAENHCAFNTILYGPSGRK | ---RWSMTEFSGARLEHSDSYQLGPSRID | 119
gi | 495571757 | ref | WP_008296336. | TAAENHCAFNTILYGPSGKK | ---RWSMTEFSGARLKRADSYALGPSRID | 95
gi | 908380581 | ref | WP_049751705. | PNPEDHCAFVALYGEK - RG | ---HWSMTEDRHALQDRDRLIVGPSQAR | 77
gi | 658524263 | ref | WP_029718812. | ADPENHCALNVALYGDAG | ---KRWMTTEGRRWMRRSRDEFVIGPSRLH | 71
gi | 332109922 | gb | EGJ10550.1 | _1- | --- | ---MTBRGRRWMRRSRDEFVIGPSRLH | 24
gi | 760103377 | ref | WP_043785587. | ADPENHCALNIALYGDAG | ---KRWMTTEGRRWMRRSRDEFVIGPSRLH | 71
gi | 760129436 | ref | WP_043810804. | ADPENHCALNIALYGDAG | ---KRWMTTEGRRWMRRSRDEFVIGPSRLH | 71
gi | 7416798 | db | BAA94047.1 | _1_1-4 | ADPENHCALNIALYGDAG | ---KRWMTTEGRRWMRRSRDEFVIGPSRLH | 194
gi | 75345570 | sp | P95619.1 | CRTCR | ADPENHCALNIALYGPQG | RGAKRWTMTEFSRASITREARRFVIGPSRLE | 194
gi | 913634290 | gb | KNZ32951.1 | _1- | ADPENHCALNIALYTPNS | ---KYWTMTEAQNAINFTEHTFTICPSHLH | 76
gi | 809277751 | ref | WP_046331236. | ANANDYCAINVALYKGG | ---GRWAMTEGQRHCQSESQFTIGPSQLS | 77
gi | 518258896 | ref | WP_019429104. | ANPDNYCALNVALYKGG | ---GRWAMTEGQRHCQSESQFTIGPSQLS | 77
gi | 518255752 | ref | WP_019425960. | ANPDNHCALNVALYKGG | ---GRWAMTEGQRHCQSESQFTIGPSQLS | 77
gi | 918152310 | gb | KOF08324.1 | _1- | ANPDHHCALNVALYKGG | ---GRWAMTEGQRHCQSESQFTIGPSQLS | 77
gi | 616553243 | gb | AAX48196.1 | _1-2 | MNPDNHCALNVALYKGG | ---GRWAMTEGQRHCQSESQFTIGPSQLS | 77
*
* : * : *
WNADGTLTIAIDBIGTP | ---LPQVRGIRVITPLFVNERAFTLDSNG | 235

```







|                                        |                                                        |     |
|----------------------------------------|--------------------------------------------------------|-----|
| gi   365289544   emb   CCD93979.1   _1 | RHRWQFIAPCCRYSDVDFHPDLHWRGDGYFDLNHGDAPLERDFQSQWQR      | 276 |
| gi   41018902   gb   AAR98493.1   _10- | RHRWQFIAPCCRYSDVDFHPDLHWRGDGYFDLNHGDAPLERDFQSQWQR      | 276 |
| gi   653027709   ref   WP_027279528.   | NHRWMP IAPCSRYEVELEKPKLRWSGEGYFDMNAGDVP IEHGFTVMEWSR   | 187 |
| gi   499791021   ref   WP_011471755.   | NHRWMP IAP SARVEVEMAAPDLAWQEGYFDMNAGDVPLEQGFVMEWSR     | 187 |
| gi   499823412   ref   WP_011504146.   | NHRWMP IAPRSRIEVLDPKLNWQGEAYIDT NAGDAP IETGFSHWEWAR    | 187 |
| gi   499762149   ref   WP_011442883.   | NHRWMP IAPRSRIEVLDPKLNWQGEAYIDT NAGDAP IETGFSHWEWAR    | 187 |
| gi   829076993   ref   WP_047310044.   | NHRWMP IAPRARVEVDLRRPNLSWQEGYLDNAGDEPIETGFRHWEWAR      | 187 |
| gi   503269006   ref   WP_013503667.   | NHRWMP IAPRARVEVDLRRPNLSWQEGYLDNAGDEPIETGFRHWEWAR      | 187 |
| gi   499470438   ref   WP_011157078.   | NHRWMP IAPRARVEVDLRRPNLSWQEGYLDNAGDEPIETGFRHWEWAR      | 187 |
| gi   501486651   ref   WP_012495141.   | NHRWMP IAPRARVEVDLRRPNLSWQEGYLDNAGDEPIETGFRHWEWAR      | 187 |
| gi   550975051   ref   WP_022723265.   | NHRWMP IAPRSRIEVDLRRPNLSWQEGYLDNAGDAP IETGFKHWEWAR     | 187 |
| gi   764538658   ref   WP_044412067.   | NHRWMP IAPCARVEVEMAQPSLRWQEGYLDNAGDAP IETGFRDWEWSR     | 187 |
| gi   754113006   ref   WP_041748751.   | NHQWMP IAPCARVQVRLDHPRLSWQGDGYFDMNHGDTPLQGFSDWQWQR     | 198 |
| gi   737680904   ref   WP_035649991.   | RHQWMP IAPFARVQVRLDHPRLSWQGDGYFDMNHGDTPLQGFSDWQWQR     | 192 |
| gi   503405597   ref   WP_013640258.   | RHRWQFIAPCARIRVAFTAPELAWEGNAYLDRNDGDEPIAHAFRRHWSR      | 190 |
| gi   657196689   ref   WP_029312388.   | AHRWQFIAPCARISVTFEKPALSWEGDAYFDRNEGDAPMHTAFSTWNSR      | 190 |
| gi   703385326   ref   WP_033417843.   | HHVWTP IAP SARVEVELENSPKLSWSGEAYLDGNAGDTP IEDAFRSHWWSR | 180 |
| gi   653032131   ref   WP_027283892.   | RHLWHP IAAARVEVALENPALRWSGPA YFDWNAGAAPLEQDFREWDWCR    | 186 |
| gi   378403832   emb   CCG08948.1   _1 | RHRWFVWMPRARIEVDLDAPAARWSGSA YFDTNDGDEPMQDAFQRWDWSR    | 263 |
| gi   754176764   ref   WP_041795395.   | RHRWFVWMPRARIEVDLDAPAARWSGSA YFDTNDGDEPMQDAFQRWDWSR    | 179 |
| gi   25989732   gb   AAN75036.1   _12- | RHVWMPFAPRSRYELRMDNPDIRWNGHG YFDFNCGSEPLQDAFSDWWSR     | 271 |
| gi   860504149   ref   WP_048445338.   | RHRWMP LSPAARLEVAFDRLSHWQGHAYLD TNEGDPLEHSHFRSWTWSR    | 179 |
| gi   860474721   ref   WP_048434413.   | RHRWMP LAPSSRIEVALDRPSLRWNHGHAYFD TNDGVALEDSFRSWTWSR   | 179 |
| gi   501291381   ref   WP_012333472.   | RHRWMP IAPASRIEVDLDRPALRWRGHAYFD TNDGDTPLEASFRSWTWSR   | 179 |
| gi   860453591   ref   WP_048427078.   | RHRWMP LAPSSRYEVAFDPSLRWSGHAYFD TNEGDPLESDSFRSWTWSR    | 166 |
| gi   860560381   ref   WP_048464709.   | HRWMP LAPTSRYEVAFDPSLRWSGHAYFD TNEGDPLEASFKSWTWSR      | 166 |
| gi   860527577   ref   WP_048454269.   | HRWMP LAPTSRYEVAFDPSLRWSGHAYFD TNEGDPLEASFKSWTWSR      | 179 |
| gi   760871815   dbj   BAQ48812.1   _1 | RHRWMP LAPSSRYEVAFDPSLRWSGHAYFD TNDGDPLESDSFRSWTWSR    | 166 |
| gi   373567336   gb   EHP93308.1   _6- | LHRWMP MAPDCEVEAAFTAPALSWRSGSYHD TNDGGALEDAFDTWTWCR    | 186 |
| gi   240009448   gb   ACS40674.1   _4- | LHRWMP MAPDCEVEAAFTAPALSWRSGSYHD TNDGGALEDAFDTWTWCR    | 177 |
| gi   218523206   gb   ACK83791.1   _4- | LHRWMP MAPDCEVEAAFTAPALSWRSGSYHD TNDGGALEDAFDTWTWCR    | 177 |
| gi   254269168   emb   CAX25134.1   _4 | LHRWMP MAPDCEVEAAFTAPALSWRSGSYHD TNDGGALEDAFDTWTWCR    | 177 |
| gi   163663749   gb   ABY31116.1   _2- | LHRWMP MAPDCEVEAAFTAPALSWRSGSYHD TNDGGALEDAFDTWTWCR    | 180 |
| gi   494837541   ref   WP_007563641.   | RHRWMP MAPSSRYEVELDQPNLRWTGSGYFD TNDGDEPLASAFIRWTWCR   | 166 |
| gi   914802769   ref   WP_050733395.   | RHRWMP MAPSSRYEVELDQPNLRWTGSGYFD TNDGDEPLASAFIRWTWCR   | 166 |
| gi   657246165   ref   WP_029357447.   | RHRWMP MSPSSRYEVDLDPDLRWSGSGYFD TNDGDEPLEAAFAFWTWSR    | 166 |
| gi   501276758   ref   WP_012319776.   | RHRWMP MSPSSRYEVDLDPDLRWSGSGYFD TNDGDEPLEAAFAFWTWSR    | 166 |
| gi   640229117   ref   WP_024829694.   | RHRWMP MSPSSRYEVDLDPDLRWSGSGYFD TNDGDEPLEAAFAFWTWSR    | 166 |
| gi   518936109   ref   WP_020091984.   | RHRWMP MSPSSRYEVDLDPDLRWSGSGYFD TNDGDEPLEAAFAFWTWSR    | 166 |
| gi   760075276   ref   WP_043757989.   | RHRWMP MAPSSRYEVDLDPDLRWSGSGYFD TNDGDEPLEAAFAFWTWSR    | 166 |
| gi   759662308   ref   WP_043379914.   | RHRWMP MAPSSRYEVDLDPDLRWSGSGYFD TNDGDEPLEAAFAFWTWSR    | 166 |
| gi   498368472   ref   WP_010682628.   | RHRWMP MAPSSRYEVAFDQGLSWSGSGYFD TNDGDEPLGAAFAFWTWSR    | 166 |
| gi   497224411   ref   WP_009538673.   | AHRWMP IAPSSRYEVLLEKPKALSWKGRAYFD TNDGSEPLEKGFKDWDCR   | 179 |
| gi   589291345   gb   AHK79488.1   _12 | LHQWRP IAP SARVEVDLEQGLQWEGRYLDSNRGEE PVEKGFYWDWSR     | 224 |
| gi   644125233   ref   WP_025281955.   | LHQWRP IAP SARVEVDLEQGLQWEGRYLDSNRGEE PVEKGFYWDWSR     | 169 |
| gi   4962218797   ref   WP_008932834.  | RHHWRP IAPCARVEVDLQQPGLRWLGHGYMDSN IGTGLEQGFYWDWSR     | 183 |



```

gi | 495659402 | ref | WP_008383981.1 | 16
gi | 687960265 | gb | KGE05197.1 | 16
gi | 496312569 | ref | WP_009021747.1
gi | 495571757 | ref | WP_008296336.1
gi | 908380581 | ref | WP_049751705.1
gi | 658524263 | ref | WP_029718812.1
gi | 332109922 | gb | EGJ10550.1 | 1-
gi | 760103377 | ref | WP_043785587.1
gi | 760129436 | ref | WP_043810804.1
gi | 7416798 | dbj | BAA94047.1 | 1-4
gi | 75345570 | sp | P95619.1 | CRTC_R
gi | 913634290 | gb | KNZ32951.1 | 1-
gi | 809277751 | ref | WP_046331236.1
gi | 518258896 | ref | WP_019429104.1
gi | 518255752 | ref | WP_019425960.1
gi | 918152310 | gb | KOF08324.1 | 1-
gi | 61653243 | gb | AAX48196.1 | 1-2

gi | 350284778 | gb | AEQ27763.1 | 1-1-
gi | 521992738 | ref | WP_020504009.1
gi | 557030915 | gb | ESQ08988.1 | 1-1-
gi | 494353717 | ref | WP_007191968.1
gi | 570733543 | gb | AHF04706.1 | 24
gi | 760081160 | ref | WP_043763735.1
gi | 528190751 | gb | EPY01080.1 | 43
gi | 748594904 | ref | WP_039853084.1
gi | 488815067 | ref | WP_002727473.1
gi | 505094729 | ref | WP_015281831.1
gi | 754165669 | ref | WP_041786299.1
gi | 739596279 | ref | WP_037453842.1
gi | 764363842 | ref | WP_044336870.1
gi | 644239143 | ref | WP_025293539.1
gi | 503035479 | ref | WP_013270455.1
gi | 617472745 | gb | KAI93218.1 | 2-
gi | 737603811 | ref | WP_0355774467.1
gi | 648530966 | ref | WP_026222717.1
gi | 288897641 | gb | ADC63477.1 | 28
gi | 760114352 | ref | WP_043796307.1
gi | 494098690 | ref | WP_007039487.1
gi | 75388571 | sp | Q7X3G5.1 | CRTC_T
gi | 390426908 | gb | AFL73973.1 | 35
gi | 752807498 | ref | WP_041446922.1
gi | 760074757 | ref | WP_043757486.1
gi | 918211006 | ref | WP_0522348303.1
gi | 499982040 | ref | WP_011662758.1

LHRWPLAPCSDEYVDLARPGLSWRCHGYLDSNI GDEPVE SAFVRWDSR 173
RHRWVPVAPSCRARVTMEKPGLSWEGHYFDN RGAEPLEAAFRWDSR 184
RHHWNP IAPIARIEVD IPSLDTQWSGDGYLDSNHGSEPLARFGSGDWTR 212
RHHWNP IAPIARVDVLP SLGTAMSGDGYLDSNRGTPLADGFGSGDWTR 188
RHRWCALAPCARIEVEMEKPRVWQEGYLD SNADEPLEDGFSGHWSR 170
RHRWGPLAPCSRIEVELDSPRVRSCHAYLDS NEGDEPIDRPFHEWDSR 164
RHRWGPLAPCSRIEVELDSPRVRSCHAYLDS NEGDEPIDRPFHEWDSR 117
RHRWGPLAPCSRIEVELDSPRNARWSGHAYV DSNEGDEPIDRPFREWDSR 164
RHRWGPLAPCSRIEVELDSPRNARWSGHAYV DSNEGDEPIDRPFREWDSR 287
RHRWGPLAPCSRIEVELDSPRVRSCHAYLDS NEGDEPIDRPFREWDSR 287
RHHWGPLAP SARIEVAFDSPTRWSGHAYLDS NEGTPIERPFTWDSR 169
KHRWGPLAP SARIEVFTKPNLHWKGSAYFDS NEGDEAVSQFSEWDSR 170
RHRWGPLAPASRIEVDINAPDLKQGHAYLDS NEGDEPDRGFHNWDSR 170
RHRWGPLAPSSRIEVLNAPDLKQGHAYLDS NEGDEPVEQGFHTWDSR 170
RHRWGPLAPASRIEVALDAPDLKQGHAYLDS NEGDEPVERGFHTWDSR 170
RHRWGPLAPASRIEVELSSPDLKQGHAYLDS NEGDEPIDQGFHTWDSR 170
* * * * *
ASMG---EESAILYHVD R-----SDGP--LSLALRFAADGTLSEFFEP 324
ASMG---EESAILYHVD R-----GDGP--LSLALRFAADGTLSEFFESP 222
AGMDG--AESAILYNI DR-----DGT P--LSLALHFANDGSLSEFFEP 213
ASLGG--DESLILYHAD RR-----EGGR--LSLGLHFAGDGLSHFDAP 213
ATLGE--DESAVLYNMD RR-----DGT P--FSLALNFAADGTLSEFFDP 235
ATLGE--DESAVLYNMD RR-----DGT P--FSLALNFAADGTLSEFFDP 235
APLQ---NGTAVLYDVT RR-----DGS D--LAVALRIGRDGKVEESDSP 269
APLQ---NGTAVLYDVT RR-----DGS D--LAVALRIGRDGKVEESDSP 222
APLK---DGTAILYDVT RR-----DGS D--LAVALRIGHDGKVEESDSP 307
TGLD---DGAAILYDVT RR-----DAER--MSLALR IAGNGEVEAFEP 209
APVGFQGRDGAAILYDVT RR-----DGS G--KVIAIRIDRAGQVESFAVP 230
ADFG---GDSAVLYNVD RR-----VGS H--LALALMIGQDGTVEFFEPL 209
AHLK---NDVAVLYEGRR R-----DGT P--FDLALKFDRQGRWHDVVQP 225
AHLK---NDVAVLYEGRR R-----DGT P--FDLALRFRQGRWHDVVQP 225
AHLK---SDSAVLYDLKR K-----DGS A--LSLALKFDRHGVPETVEPP 212
ACLS---DSAVMLYEGTR Q-----NGSK--FNMGIQIAADGSGVSPVELR 297
APVG---AGAAVLYDAIR R-----DGS A--VSLALRIRADGRVTPAEAP 208
ANIG---DDAAVLYDAER R-----REAP--LSLALRFSASGEMETLDP 206
AELKHG---AAILYDTRAR-----DDQG--AHLALRFDANA EVD EFALP 297
AELKHG---AAILYDTRAR-----DDQG--AHLALRFDANA EVD EFALP 209
AELKQG---AAILYDVT R-----EGRFGAELALRCDHRGQLDRFDPP 211
ANTPSG---TTWMLYDVTAR-----HGTG--ASLALRFNASGEVEFFPPP 298
AELKDGG---TAVLYDAARR-----DGH R--TELGLHFD PAGDVERIDVP 259
AELKDGG---TAVLYDAARR-----DGH R--TELGLHFD PAGDVERIDVP 220
AMLSDGG---AAILYDVTQR-----EGHR--PPLGLRFAANGDVEHFEAP 228
AMLSDGG---AAILYDVTQR-----EGHR--PPLGLRFAANGDVEHFEAP 220
TALKHG---AAVLYDVTGR-----EGPG--PVLGLRFRDPNGDVEHFEAP 228

```



|                |                      |         |     |             |     |      |     |             |               |           |     |
|----------------|----------------------|---------|-----|-------------|-----|------|-----|-------------|---------------|-----------|-----|
| gi   493840365 | ref   WP_006787509.  | AEIKDG  | --- | TAILYDITRR  | --- | NGEA | --- | FALALKYHPD  | SGLTQLPPP     | 212       |     |
| gi   653037601 | ref   WP_027289289.  | APLPSGG | --- | TAITYDTFRR  | --- | DGSD | --- | HALSLLVVRK  | DGGIERFDNA    | 236       |     |
| gi   519009821 | ref   WP_020165696.  | SNLRGGD | --- | TAVLYDVQRR  | --- | DGTP | --- | HTLALHFAD   | DGGCRSFAAP    | 232       |     |
| gi   518759539 | ref   WP_019916969.  | SNLRGGD | --- | TAVLYDVERR  | --- | DGTP | --- | HSLALHFAD   | DGGCRSFAAP    | 228       |     |
| gi   495340016 | ref   WP_008064750.  | SSLRGGD | --- | TAVLYDVQRR  | --- | DGTP | --- | HSLALHFAD   | DGGCRHFAAP    | 228       |     |
| gi   517223140 | ref   WP_018411958.  | CTLRGGD | --- | TAVLYDVSGR  | --- | DGAR | --- | TALALHFAD   | GQRRFDAP      | 230       |     |
| gi   889919304 | ref   WP_048861895.  | APLRDG  | --- | AAILYDVRRR  | --- | DGSV | --- | QNLSLRVGR   | DGRVADYAAP    | 226       |     |
| gi   496441596 | ref   WP_009150441.  | AKRRQGG | --- | AVVLYEANRR  | --- | DGSA | --- | LSLALQVNR   | DGSVEPFEPP    | 302       |     |
| gi   146409846 | gb ABQ38352.1  _10   | AAATRG  | --- | TVISYDITAR  | --- | TGAG | --- | KSIALHIDP   | DARLDRLAPL    | 315       |     |
| gi   908659074 | ref   WP_049795525.  | AAATRG  | --- | TVISYDITAR  | --- | TGAG | --- | KSIALHIDP   | DARLDRLAPL    | 222       |     |
| gi   365289544 | emb   CCD93979.1  _1 | AAATRG  | --- | TVISYDITVAR | --- | AGTD | --- | KSIALHVDP   | DARLRRIAPL    | 315       |     |
| gi   41018902  | gb AAR98493.1  _10   | AAATSG  | --- | AVISYDAIAR  | --- | DHAI | --- | SPLALHYDHT  | GRLEPIAPL     | 315       |     |
| gi   653027709 | ref   WP_027279528.  | AALRNG  | --- | TAILYEAERR  | --- | DGSR | --- | LDLALQFDK   | SGAMQMFDFP    | 226       |     |
| gi   499791021 | ref   WP_011471755.  | AALRDG  | --- | TAILYEAARR  | --- | DGTR | --- | FDLAIKFDG   | NGEMEHFEAP    | 226       |     |
| gi   499823412 | ref   WP_011504146.  | GALRDK  | --- | TAILYEAERR  | --- | DGSR | --- | LDLAVTFDA   | QGNMERFAQP    | 226       |     |
| gi   499762149 | ref   WP_011442883.  | GALRDK  | --- | TAILYEAERR  | --- | DGSR | --- | VDLAITFDA   | QGNMERFTPP    | 226       |     |
| gi   829076993 | ref   WP_047310044.  | GAMRDK  | --- | TVILYEAERR  | --- | DGSR | --- | VDLAVTFDADG | NKQEFTHPP     | 226       |     |
| gi   503269006 | ref   WP_013503667.  | GAMRDK  | --- | TVILYEAERR  | --- | DGSR | --- | VDLAVTFDADG | NKQEFTHPP     | 226       |     |
| gi   499470438 | ref   WP_011157078.  | GAMRDK  | --- | TVILYEAERR  | --- | DGSR | --- | VDLAVTFDAE  | GNKQEFTHPP    | 226       |     |
| gi   501486651 | ref   WP_012495141.  | GAMRDK  | --- | TVILYEAERR  | --- | DGSR | --- | VDLAVTFDAE  | GNKQEFTHPP    | 226       |     |
| gi   550975051 | ref   WP_022723265.  | GALRDK  | --- | TAILYEAERR  | --- | DGSR | --- | IDLAMTFDA   | QGNMOPFTPP    | 226       |     |
| gi   764538658 | ref   WP_044412067.  | GALRDG  | --- | TAILYEAERR  | --- | DGSR | --- | FDLAVTFDAK  | GNMOPFERP     | 226       |     |
| gi   754113006 | ref   WP_041748751.  | GAMQDG  | --- | TAILYEAQRR  | --- | DGSR | --- | IDLAMTFDP   | NGRMQTFEPP    | 237       |     |
| gi   737680904 | ref   WP_035649991.  | GAMQDG  | --- | TAILYEAERR  | --- | DGSR | --- | VDLAMTFDR   | NGRMQAFEP     | 231       |     |
| gi   503405597 | ref   WP_013640258.  | AAATQG  | --- | AAILYHAERR  | --- | DGGQ | --- | TSLALGFA    | AGGGATAFTPP   | 229       |     |
| gi   657196689 | ref   WP_029312388.  | APSRQG  | --- | ARVYHANRR   | --- | DGGT | --- | TALS LGFTA  | AGGAAPLHAP    | 229       |     |
| gi   703395326 | ref   WP_033417843.  | NPLRDG  | --- | SAVLYDVAR   | --- | DGSA | --- | INLALRF     | DGHGEVSRFEPP  | 219       |     |
| gi   653032131 | ref   WP_027283892.  | APMADR  | --- | TAILYHAERR  | --- | DGSS | --- | QSLALRF     | DEDEGAVGAFPP  | 225       |     |
| gi   378403832 | emb   CCG08948.1  _1 | GDLADGG | --- | CALLYDLTPRH | --- | RGPA | --- | RLLSLR      | LTPGQWEEVAPP  | 305       |     |
| gi   754176764 | ref   WP_041795395.  | GDLADGG | --- | CALLYDLTPRH | --- | RGPA | --- | RLLSLR      | LTPGQWEEVAPP  | 221       |     |
| gi   25989732  | gb AAN75036.1  _12   | APLADGG | --- | AAILYEVTPR  | --- | QGAD | --- | RLLSLR      | VDRD          | GALSASFSP | 311 |
| gi   860504149 | ref   WP_048445338.  | STLRHG  | --- | AAILYDVLRR  | --- | DGSR | --- | QDLSLR      | FDPDGT        | PRPIAPP   | 218 |
| gi   860474721 | ref   WP_048434413.  | STLRHG  | --- | AAILYDVLRR  | --- | DGSR | --- | QDLSLR      | FDPDGT        | PRPIAPP   | 218 |
| gi   501291381 | ref   WP_012333472.  | ATLRHG  | --- | AAILYDVLRR  | --- | DGTR | --- | QDLSLR      | FDPDGT        | PRPIAPP   | 218 |
| gi   860453591 | ref   WP_048427078.  | ATLRHG  | --- | AAILYDVLRR  | --- | DGSR | --- | QDLSLR      | FDPDGT        | PRPIAPP   | 205 |
| gi   860560381 | ref   WP_048464709.  | ATLRHG  | --- | AAILYDVLRR  | --- | DGSR | --- | QDLSLR      | FDPDGT        | PRPIAPP   | 205 |
| gi   860527577 | ref   WP_048454269.  | ATLRHG  | --- | AAILYDVLRR  | --- | DGSR | --- | QDLSLR      | FDPDGT        | PRPIAPP   | 218 |
| gi   760871815 | dbj BAQ48812.1  _1   | ATLRHG  | --- | AAILYDVAR   | --- | DGSR | --- | QELSLRF     | FDPDGT        | PRPIAPP   | 205 |
| gi   373567336 | gb EHP93308.1  _6    | APLKRK  | --- | SAILYDVLRR  | --- | DGGG | --- | QNLTLRF     | FADGT         | RREMRPP   | 225 |
| gi   240009448 | gb ACS40674.1  _4    | APLKRK  | --- | SAILYDVLRR  | --- | DGGG | --- | QNLTLRF     | FADGT         | RREMRPP   | 216 |
| gi   218523206 | gb ACK83791.1  _4    | APLKRK  | --- | SAILYDVLRR  | --- | DGGG | --- | QNLTLRF     | FADGT         | RREMRPP   | 216 |
| gi   254269168 | emb   CAX25134.1  _4 | APLKRK  | --- | SAILYDVLRR  | --- | DGGG | --- | QNLTLRF     | FADGT         | RREMRPP   | 216 |
| gi   163663749 | gb ABY31116.1  _2    | APLKRK  | --- | SAILYDVLRR  | --- | DGGG | --- | QNLTLRF     | FADGT         | RREMRPP   | 219 |
| gi   494837541 | ref   WP_007563641.  | ADLPDG  | --- | AAILYDVRHR  | --- | DGGG | --- | QNLSLRF     | CHDGNRREIRPP  | 205       |     |
| gi   914802769 | ref   WP_050733395.  | ADLPDG  | --- | AAILYDVRHR  | --- | NGGG | --- | QNLSLRF     | SHDGSRRREIRPP | 205       |     |
| gi   657246165 | ref   WP_029357447.  | ADLPDG  | --- | AAILYDVVHR  | --- | DGGG | --- | QNLSLRF     | SADGSRRREIRPP | 205       |     |

|                                         |         |     |            |       |       |     |      |       |     |      |       |        |     |     |     |     |     |     |     |     |     |   |     |   |     |     |   |   |   |   |   |   |   |   |   |   |   |   |   |     |     |     |     |     |
|-----------------------------------------|---------|-----|------------|-------|-------|-----|------|-------|-----|------|-------|--------|-----|-----|-----|-----|-----|-----|-----|-----|-----|---|-----|---|-----|-----|---|---|---|---|---|---|---|---|---|---|---|---|---|-----|-----|-----|-----|-----|
| gi   501276758   ref   WP_012319776.    | ADLPDG  | --- | AAIYDVVHR  | ---   | DGGG  | --- | QNL  | SLRFS | ADG | SRR  | IRPP  | 205    |     |     |     |     |     |     |     |     |     |   |     |   |     |     |   |   |   |   |   |   |   |   |   |   |   |   |   |     |     |     |     |     |
| gi   640229117   ref   WP_024829694.    | ADLPDG  | --- | AAIYDVVHR  | ---   | DGGG  | --- | QNL  | SLRFS | ADG | SRR  | IRPP  | 205    |     |     |     |     |     |     |     |     |     |   |     |   |     |     |   |   |   |   |   |   |   |   |   |   |   |   |   |     |     |     |     |     |
| gi   518936109   ref   WP_020091984.    | ADLPDG  | --- | AAIYDVVHR  | ---   | DGGG  | --- | QNL  | SLRFS | ADG | SRR  | IRPP  | 205    |     |     |     |     |     |     |     |     |     |   |     |   |     |     |   |   |   |   |   |   |   |   |   |   |   |   |   |     |     |     |     |     |
| gi   760075276   ref   WP_043757989.    | ADLPDG  | --- | AAIYDVVHR  | ---   | DGGG  | --- | QNL  | SLRFS | ADG | SRR  | IRPP  | 205    |     |     |     |     |     |     |     |     |     |   |     |   |     |     |   |   |   |   |   |   |   |   |   |   |   |   |   |     |     |     |     |     |
| gi   759662308   ref   WP_043379914.    | ADLPDG  | --- | AAIYDVVHR  | ---   | DGGG  | --- | QNL  | SLRFS | ADG | SRR  | IRPP  | 205    |     |     |     |     |     |     |     |     |     |   |     |   |     |     |   |   |   |   |   |   |   |   |   |   |   |   |   |     |     |     |     |     |
| gi   498368472   ref   WP_010682628.    | ADLQDG  | --- | AAIYDVQHR  | ---   | EGGG  | --- | QNL  | SLRFS | SDG | SRR  | IRPP  | 205    |     |     |     |     |     |     |     |     |     |   |     |   |     |     |   |   |   |   |   |   |   |   |   |   |   |   |   |     |     |     |     |     |
| gi   497224411   ref   WP_009538673.    | APLDGG  | --- | AAIYETRPL  | ---   | DGPS  | --- | RCL  | SLRIG | RDG | SSR  | IEIPP | 219    |     |     |     |     |     |     |     |     |     |   |     |   |     |     |   |   |   |   |   |   |   |   |   |   |   |   |   |     |     |     |     |     |
| gi   589291345   gb   AHK79488.1  _1-12 | AVMEDQE | --- | TVVLYEADR  | ---   | DGGH  | --- | SLLS | LRFD  | ADG | KARE | VEAP  | 264    |     |     |     |     |     |     |     |     |     |   |     |   |     |     |   |   |   |   |   |   |   |   |   |   |   |   |   |     |     |     |     |     |
| gi   644125233   ref   WP_025281955.    | AVMEDQE | --- | TVVLYEADR  | ---   | DGGH  | --- | SLLS | LRFD  | ADG | KARE | VEAP  | 209    |     |     |     |     |     |     |     |     |     |   |     |   |     |     |   |   |   |   |   |   |   |   |   |   |   |   |   |     |     |     |     |     |
| gi   496218797   ref   WP_008932834.    | AVMPNGD | --- | TVVLYEATQR | ---   | DDQE  | --- | RML  | TLRFD | PRG | VRD  | VEPP  | 223    |     |     |     |     |     |     |     |     |     |   |     |   |     |     |   |   |   |   |   |   |   |   |   |   |   |   |   |     |     |     |     |     |
| gi   495659402   ref   WP_008383981.    | AALPDGS | --- | AAVLYHAI   | RRGAD | GGEAE | --- | TGL  | ALRFD | RS  | GA   | VF    | FDAP   | 218 |     |     |     |     |     |     |     |     |   |     |   |     |     |   |   |   |   |   |   |   |   |   |   |   |   |   |     |     |     |     |     |
| gi   687960265   gb   KGE05197.1  _1-16 | APLADGG | --- | SLVQYHARL  | ---   | DGSE  | --- | RL   | LALR  | F   | GAT  | GA    | VELDPL | 224 |     |     |     |     |     |     |     |     |   |     |   |     |     |   |   |   |   |   |   |   |   |   |   |   |   |   |     |     |     |     |     |
| gi   496312569   ref   WP_009021747.    | ARLNNGD | --- | CAVRYEARYP | ---   | GLEP  | --- | HL   | ALR   | FA  | Q    | DS    | IAE    | PSQ | 252 |     |     |     |     |     |     |     |   |     |   |     |     |   |   |   |   |   |   |   |   |   |   |   |   |   |     |     |     |     |     |
| gi   495571757   ref   WP_008296336.    | ARLSNGD | --- | CAVRYEARHG | ---   | ARKP  | --- | HL   | ALR   | FK  | D    | GS    | IA     | SE  | TR  | 228 |     |     |     |     |     |     |   |     |   |     |     |   |   |   |   |   |   |   |   |   |   |   |   |   |     |     |     |     |     |
| gi   908380581   ref   WP_049751705.    | ASDTPG  | --- | TTVLYDVTPR | ---   | QGAP  | --- | YR   | KAI   | H   | F    | H     | Q      | T   | V   | ET  | PAP | 209 |     |     |     |     |   |     |   |     |     |   |   |   |   |   |   |   |   |   |   |   |   |   |     |     |     |     |     |
| gi   658524263   ref   WP_029718812.    | ATMADGS | --- | TAVIYDVRQK | ---   | RDGD  | --- | R    | VIA   | E   | R    | F     | L      | L   | D   | G   | S   | T   | S   | F   | E   | A   | P | 204 |   |     |     |   |   |   |   |   |   |   |   |   |   |   |   |   |     |     |     |     |     |
| gi   332109922   gb   EGJ10550.1  _1-1  | ATMADGS | --- | TAVIYDVRQK | ---   | RDGD  | --- | R    | VIA   | E   | R    | F     | L      | L   | D   | G   | S   | T   | S   | F   | E   | A   | P | 157 |   |     |     |   |   |   |   |   |   |   |   |   |   |   |   |   |     |     |     |     |     |
| gi   760103377   ref   WP_043785587.    | ATMADGS | --- | TAVIYDVRQK | ---   | RDGD  | --- | R    | VIA   | E   | R    | F     | L      | L   | D   | G   | S   | T   | S   | F   | E   | A   | P | 204 |   |     |     |   |   |   |   |   |   |   |   |   |   |   |   |   |     |     |     |     |     |
| gi   760129436   ref   WP_043810804.    | ATMADGS | --- | TAVIYDVRQK | ---   | RDGD  | --- | R    | VIA   | E   | R    | F     | L      | L   | D   | G   | S   | T   | S   | F   | E   | A   | P | 204 |   |     |     |   |   |   |   |   |   |   |   |   |   |   |   |   |     |     |     |     |     |
| gi   7416798   gb   BAA94047.1  _1-4    | ATMADGS | --- | TAVIYDVRQK | ---   | RDGD  | --- | R    | VIA   | E   | R    | F     | L      | L   | D   | G   | S   | T   | S   | F   | E   | A   | P | 327 |   |     |     |   |   |   |   |   |   |   |   |   |   |   |   |   |     |     |     |     |     |
| gi   75345570   sp   P95619.1  CRTC_R   | ATMADSS | --- | TAVIYDVRQK | ---   | RDGD  | --- | R    | VIA   | E   | R    | F     | L      | L   | D   | G   | S   | T   | S   | F   | E   | A   | P | 327 |   |     |     |   |   |   |   |   |   |   |   |   |   |   |   |   |     |     |     |     |     |
| gi   913634290   gb   KNZ32951.1  _1-1  | CSLRDGS | --- | TAVIYDVRQK | ---   | QGAD  | --- | R    | V     | L   | A    | L     | R      | F   | T   | Q   | D   | G   | E   | V   | E   | P   | F | E   | P | 209 |     |   |   |   |   |   |   |   |   |   |   |   |   |   |     |     |     |     |     |
| gi   809277751   ref   WP_046331236.    | AHLKDG  | --- | TAVIYDVRQS | ---   | NGAE  | --- | R    | I     | A   | S    | K     | E      | N   | V   | D   | G   | T   | V   | E   | P   | F   | A | A   | P | 210 |     |   |   |   |   |   |   |   |   |   |   |   |   |   |     |     |     |     |     |
| gi   518258896   ref   WP_019429104.    | ARTRDGS | --- | TVVLYDMQAP | ---   | ATED  | --- | R    | V     | L   | S    | L     | R      | F   | T   | P   | R   | G   | T   | V   | E   | P   | I | A   | T | P   | 210 |   |   |   |   |   |   |   |   |   |   |   |   |   |     |     |     |     |     |
| gi   518255752   ref   WP_019425960.    | ARMRDGS | --- | TVVLYDMQAP | ---   | GTED  | --- | R    | V     | L   | S    | L     | R      | F   | S   | P   | K   | G   | T   | V   | E   | P   | M | A   | T | P   | 210 |   |   |   |   |   |   |   |   |   |   |   |   |   |     |     |     |     |     |
| gi   918152310   gb   KOF08324.1  _1-1  | ARMRDGS | --- | TVVLYDMQAP | ---   | GAED  | --- | R    | V     | L   | S    | L     | L      | F   | T   | P   | Q   | G   | A   | V   | E   | P   | I | A   | A | P   | 210 |   |   |   |   |   |   |   |   |   |   |   |   |   |     |     |     |     |     |
| gi   61653243   gb   AAX48196.1  _1-2   | ARMRDGS | --- | TLVLYDMQAP | ---   | HTQD  | --- | R    | V     | L   | S    | L     | R      | F   | T   | P   | K   | G   | V   | E   | I   | D   | T | P   |   |     | 210 |   |   |   |   |   |   |   |   |   |   |   |   |   |     |     |     |     |     |
| gi   350284778   gb   AEQ27763.1  _1-1  | PNHRLP  | R   | T          | P     | I     | W   | R    | S     | S   | Q    | A     | D      | A   | D   | H   | --- | P   | P   | K   | I   | V   | K | T   | L | E   | D   | T | P | F | Y | S | R | S | V | I | A | S | H | L | 370 |     |     |     |     |
| gi   521992738   ref   WP_020504009.    | PNHRLP  | R   | T          | P     | I     | W   | R    | S     | S   | Q    | A     | D      | A   | D   | H   | --- | P   | P   | R   | I   | V   | K | T   | L | E   | D   | T | P | F | Y | S | R | S | V | I | A | S | H | L | 268 |     |     |     |     |
| gi   557030915   gb   ESQ08988.1  _1-1  | PNHRLP  | R   | T          | P     | I     | W   | R    | S     | S   | Q    | A     | D      | A   | D   | H   | --- | P   | P   | R   | V   | V   | K | T   | L | E   | D   | T | P | F | Y | S | R | S | V | I | D | S | H | L | 259 |     |     |     |     |
| gi   494353717   ref   WP_007191968.    | PDHRLA  | R   | T          | P     | I     | W   | R    | M     | P   | R    | S     | S      | Q   | A   | D   | A   | K   | H   | --- | P   | P   | R | V   | V | K   | T   | L | E | D | T | P | F | Y | S | R | S | V | I | A | S   | H   | L   | 259 |     |
| gi   570733543   gb   AHF04706.1  _24   | PNHKL   | P   | R          | G     | T     | V   | M    | R     | S   | P    | R     | S      | M   | Q   | A   | D   | E   | --- | P   | P   | R   | I | V   | E | T   | L   | E | D | T | P | F | Y | S | R | S | V | S | A | K | L   | 279 |     |     |     |
| gi   760081160   ref   WP_043763735.    | PNHKL   | P   | R          | G     | T     | V   | M    | R     | S   | P    | R     | S      | M   | Q   | A   | D   | E   | --- | P   | P   | R   | I | V   | E | T   | L   | E | D | T | P | F | Y | S | R | S | V | S | A | K | L   | 279 |     |     |     |
| gi   528190751   gb   EPY01080.1  _43   | PMSAL   | P   | R          | G     | -     | A   | W    | G     | V   | E    | R     | V      | S   | R   | A   | D   | S   | G   | H   | --- | T   | A | R   | L | A   | E   | V | L | E | D | T | P | F | Y | T | R | S | V | I | D   | T   | R   | L   | 314 |
| gi   748594904   ref   WP_039853084.    | PMSAL   | P   | R          | G     | -     | A   | W    | G     | V   | E    | R     | V      | S   | R   | A   | D   | S   | G   | H   | --- | T   | A | R   | L | A   | E   | V | L | E | D | T | P | F | Y | T | R | S | V | I | D   | T   | R   | L   | 267 |
| gi   488815067   ref   WP_002727473.    | PVADL   | P   | R          | G     | -     | V   | M    | G     | D   | R    | A     | T      | R   | A   | D   | S   | G   | H   | --- | A   | A   | Q | L   | A | E   | I   | L | E | D | T | P | F | Y | T | R | S | M | V | E | T   | R   | L   | 352 |     |
| gi   505094729   ref   WP_015281831.    | PPAPL   | A   | T          | S     | V     | M   | R    | I     | A   | R    | A     | T      | Q   | A   | D   | T   | Q   | --- | P   | A   | R   | V | E   | T | L   | E   | D | T | P | F | Y | A | R | S | V | I | A | T | H | L   | 255 |     |     |     |
| gi   754165669   ref   WP_041786299.    | PRVAL   | P   | G          | S     | F     | W   | R    | I     | N   | G    | V     | R      | C   | E   | S   | G   | --- | T   | A   | A   | V   | R | E   | L | V   | D   | A | P | F | A | R | S | V | A | T | R | M |   |   | 276 |     |     |     |     |
| gi   739596279   ref   WP_037453842.    | PRVTL   | P   | A          | S     | R     | W   | R    | I     | P   | R    | T     | R      | A   | D   | P   | Q   | --- | P   | V   | T   | V   | E | T   | L | V   | D   | A | P | F | A | R | S | V | L | A | T | H |   |   | 255 |     |     |     |     |
| gi   764363842   ref   WP_044336870.    | TAARL   | P   | R          | T     | -     | G   | L    | V     | D   | R    | A     | T      | R   | V   | D   | A   | G   | H   | --- | R   | P   | R | V   | T | K   | T   | W | I | D | A | P | F | A | R | S | A | L | S | T | H   | L   | 270 |     |     |
| gi   644239143   ref   WP_025293539.    | APARL   | P   | R          | T     | -     | G   | L    | V     | M   | R    | Q     | T      | R   | A   | D   | S   | G   | A   | --- | A   | P   | R | I   | L | K   | T   | W | I | D | A | P | F | A | R | S | S | I | A | T | R   | L   | 270 |     |     |
| gi   503035479   ref   WP_013270455.    | PHAA    | L   | P          | A     | T     | -   | L    | W     | E   | M    | P     | R      | H   | T   | R   | A   | D   | A   | R   | --- | P   | V | S   | V | E   | R   | T | W | E | D | T | P | F | Y | S | R | S | T | I | R   | T   | H   | L   | 257 |
| gi   617472745   gb   KAI93218.1  _2-   | ERCD    | L   | P          | L     | T     | R   | Y    | W     | K   | M    | P     | R      | E   | T   | R   | V   | D   | A   | G   | H   | --- | T | A   | N | V   | E   | Q | L | E | D | T | P | F | Y | S | R | S | M | I | A   | T   | H   | L   | 343 |
| gi   737603811   ref   WP_035574467.    | PEAG    | L   | P          | G     | T     | -   | L    | W     | R   | I    | P     | R      | R   | T   | R   | A   | D   | A   |     | --- | T   | P | G   | V | L   | A   | T | L | E | D | A | P | F | A | R | S | T | L | A | T   | R   | L   | 253 |     |

|                |                        |                                                        |     |
|----------------|------------------------|--------------------------------------------------------|-----|
| gi   648530966 | ref   WP_026222717.1   | PLAPLPI-T-KWRVQRRT-RADDG-----VAQAIRSRFEDAPFFYRSLSVAAKF | 250 |
| gi   288897641 | gb   ADC63477.1   _28  | PRAPLP-TTSVMRIERGIQCEAGDE---PRVVTILEDTPFYARSVVETRL     | 343 |
| gi   760114352 | ref   WP_043796307.1   | PRAPLP-TTSVMRIERGIQCEAGDE---PRVVTILEDTPFYARSVVETRL     | 255 |
| gi   494098690 | ref   WP_007039487.1   | PRVPIQTTTRVWICRGQTQSEPGHE---TRVVDTLEDTPFYARSVLESQI     | 257 |
| gi   75388571  | sp   Q7X3G5.1   CRTC_T | PRVPLPTTGIWRIKRGTCQCEAGHQ---ARVVEITLEDTPFYARSLVETRL    | 344 |
| gi   390426908 | gb   AFL73973.1   _35  | PHATLP-T-AWLMQRGTRVDPQQT---ARVTEITLNTFFYTRSVLETHL      | 304 |
| gi   752807498 | ref   WP_041446922.1   | PHATLP-T-AWLMQRGTRVDPQQT---ARVTEITLNTFFYTRSVLETHL      | 265 |
| gi   760074757 | ref   WP_043757486.1   | PHVRLPNT-SWLMRRRGRTRVANKF---ARVAETLEDTPFYTRSVLESHL     | 273 |
| gi   918211006 | ref   WP_052348303.1   | PHVRLPNT-SWLMRRRGRTRVANKF---ARVAETLEDTPFYTRSVLESHL     | 265 |
| gi   499982040 | ref   WP_011662758.1   | PRIKLPNT-LWRVRETRVDHQSS---ARVATLEDTPFYARSVLETNL        | 273 |
| gi   493840365 | ref   WP_006787509.1   | PAHLPSPGPIWIRAGRNQADEGHQ---PRIAKTFEDTPFYARSMVHSQI      | 258 |
| gi   653037601 | ref   WP_027289289.1   | VLNDLPSTSIWIRRRKGRADAGR---ACVSKTLEDTPFYARSLVETHL       | 282 |
| gi   519009821 | ref   WP_020165696.1   | AAHELPG-TRWGIAARTRSEGGTT---PQAR-TLEDTPFYARSLLDTCI      | 276 |
| gi   518759539 | ref   WP_019916969.1   | AAHELPG-TRWGIAARTRSEGGTT---PQAR-TLEDTPFYARSLLDTCI      | 272 |
| gi   495340016 | ref   WP_008064750.1   | AERTLPG-TRWGIAARTRSEADTS---PQVR-TLEDTPFYARSLLDTRL      | 272 |
| gi   517223140 | ref   WP_018411958.1   | PECTLPG-TRWGIAARTRCERGA---PQVR-TLEDTPFYARSLLDTRL       | 274 |
| gi   889919304 | ref   WP_048861895.1   | AACPDPG-TRWGIAARTRAEPTGG---TRLRITLTDAPFYARSLLDTRI      | 271 |
| gi   496441596 | ref   WP_009150441.1   | ARVPLPTTWWIARARTRSEHPVGTETRAQVLELEDTPFYARSLIATRL       | 352 |
| gi   146409846 | gb   ABQ38352.1   _10  | ADAPLRR-T-LWRIDRSARADSETP---VRVSTLEDAPFYARSHLAARI      | 360 |
| gi   908659074 | ref   WP_049795525.1   | ADAPLRR-T-LWRIDRSARADSETP---VRVSTLEDAPFYARSHLAARI      | 267 |
| gi   365289544 | emb   CCD93979.1   _1  | AESPLRKT-LWRVDRSARADAFS---VRVSTLEDAPFYARSHLAARI        | 360 |
| gi   41018902  | gb   AAR98493.1   _10  | VDCRLPKT-LWRVRSARADAGAP---VRVSTLEDAPFYARSHLAARV        | 360 |
| gi   653027709 | ref   WP_027279528.1   | TIHPLPRT-PWRVRSARSQIE---AAVVRTLEDSPFYARSMIATTL         | 269 |
| gi   499791021 | ref   WP_011471755.1   | ALERLQRT-PWRVDRSARSEAG---ARVVKTLEDSPFYARSMIATTL        | 269 |
| gi   499823412 | ref   WP_011504146.1   | PLMTLPRS-GWKVRSARSEID---AKVLRITLEDTPFYARSMVATTL        | 269 |
| gi   499762149 | ref   WP_011442883.1   | PLLPPLRS-GWKVRSARSETD---ARVIRTLEDSPFYARSMVATTL         | 269 |
| gi   829076993 | ref   WP_047310044.1   | QLLPPLRS-GWKVDRSARSETG---AKLVRTLEDTPFYARSMVETTL        | 269 |
| gi   530269006 | ref   WP_013503667.1   | QLLPPLRS-GWKVDRSARSETG---AKLVRTLEDTPFYARSMVETTL        | 269 |
| gi   499470438 | ref   WP_011157078.1   | QLLPPLRS-GWKVDRSARSEAS---VKLVRTLEDTPFYARSMVETTL        | 269 |
| gi   501486651 | ref   WP_012495141.1   | QLLPPLRS-GWKVDRSARSEAS---VKLVRTLEDTPFYARSMVETTL        | 269 |
| gi   550975051 | ref   WP_022723265.1   | PLLPPLRS-GWKVARSARSETD---ARLLRITLEDTPFYARSMIDTTL       | 269 |
| gi   764538658 | ref   WP_044412067.1   | QLVPLARS-GWRVNRNARSNDG---ARVVKTLEDAPFYTRSVVATTL        | 269 |
| gi   754113006 | ref   WP_041748751.1   | PTIDLRR-T-GWRVARSARSDSA---AKIVKTLEDAPFYARSVVSASL       | 280 |
| gi   737680904 | ref   WP_035649991.1   | PTVKLRR-T-GWRVARSVRSDGA---AKIVKTLEDAPFYARSVLSAKL       | 274 |
| gi   503405597 | ref   WP_013640258.1   | PAALPAT-RWRILARETRSDGAS---LIRNLEDTPFYARARIGASL         | 272 |
| gi   657196689 | ref   WP_029312388.1   | PEAPLPI-T-RWRINRATRCADAE---PRLIRAFEDTPFYARARIAATI      | 274 |
| gi   703385326 | ref   WP_033417843.1   | PAVLPKT-GWRIDRASRGGGAA---A-IVQITLEDTPFYARSLSTTL        | 263 |
| gi   653032131 | ref   WP_027283892.1   | PPVSLPR-T-LWRIRRPTRSEDGHA---R-VLRTLEDTPFYARSVIETRL     | 269 |
| gi   378403832 | emb   CCG08948.1   _1  | PPAALPAGPSWVGARGIRSTG---PARVETLEDTPFYTRSLVESVF         | 349 |
| gi   754176764 | ref   WP_041795395.1   | PPAALPAGPSWVGARGIRSTG---PARVETLEDTPFYTRSLVESVF         | 265 |
| gi   25989732  | gb   AAN75036.1   _12  | PKAPLGA-TGWRVARGTRCDVG---APTVLRTLEDTPFYARSLSTRL        | 356 |
| gi   860504149 | ref   WP_048445338.1   | VPAPLPR-T-LWRILPRTRSDD---GTAAVLRRFEDAPFYRSLSLSARI      | 262 |
| gi   860474721 | ref   WP_048434413.1   | LPAALPRT-LWRILPRATRSDD---GQARVLRFRFEDAPFYRSLSLAARI     | 262 |
| gi   501291381 | ref   WP_012333472.1   | IPAAIPPT-LWRILKRATRSDD---GQARVLRFRFEDAPFYRSLSLAARI     | 262 |
| gi   860453591 | ref   WP_048427078.1   | VPAALPRT-LWRILPRATRSDD---GQAAVLRFRFEDAPFYRSLSLSARI     | 249 |
| gi   860560381 | ref   WP_048464709.1   | VPAALPRT-LWRILPRATRSDD---GRAAVLRRFEDAPFYRSLSLSARI      | 249 |

|                |                         |              |                   |         |           |         |                |                |               |     |
|----------------|-------------------------|--------------|-------------------|---------|-----------|---------|----------------|----------------|---------------|-----|
| gi   860527577 | ref   WP_048454269.     | VPAALPRT-LWR | LPRATRSDD         | ----    | GRAALLRRR | FE      | DAPFFYRSLLAARI | 262            |               |     |
| gi   760871815 | dbj   BAQ48812.1   _1   | VPAALPRT-LWR | LERATRSDD         | ----    | GQASVLR   | RRR     | FE             | DAPFFYRSLLSARI | 249           |     |
| gi   373567336 | gb   EHP93308.1   _6    | LAAGLPSTGL   | WRMPRTTRGDD       | ----    | GRAQVIR   | T       | FE             | DPFFYARSLAATL  | 270           |     |
| gi   240009448 | gb   ACS40674.1   _4    | LAAGLPSTGL   | WRMPRTTRGDD       | ----    | GRAQVIR   | T       | FE             | DPFFYARSLAATL  | 261           |     |
| gi   218523206 | gb   ACK83791.1   _4    | LAAGLPSTGL   | WRMPRTTRGDD       | ----    | GRAQVIR   | T       | FE             | DPFFYARSLAATL  | 261           |     |
| gi   254269168 | emb   CAX25134.1   _4   | LAAGLPPTDL   | WRMPRTTRSD        | ----    | GRAQVIR   | T       | FE             | DPFFYARSLAATL  | 261           |     |
| gi   163663749 | gb   ABY31116.1   _2    | LAATLPPTGL   | WRMPRRSRSD        | ----    | GRAQVIR   | T       | FE             | DPFFYARSLAATL  | 264           |     |
| gi   494837541 | ref   WP_007563641.     | LAAPLPSTSF   | WRMPRETRSD        | ----    | GRARVLT   | T       | FE             | DPFFYARSLAATL  | 250           |     |
| gi   914802769 | ref   WP_050733395.     | LAAPLPSTSF   | WRMPRETRSD        | ----    | GRARVLT   | T       | FE             | DPFFYARSLAATL  | 250           |     |
| gi   657246165 | ref   WP_029357447.     | PGATLPATRF   | WRMPRETRSDG       | ----    | GSRVLIAT  | Y       | ED             | DPFFYARSLAATL  | 250           |     |
| gi   501276758 | ref   WP_012319776.     | PGATLPATRF   | WRMPRETRSDG       | ----    | GSRVLIAT  | Y       | ED             | DPFFYARSLAATL  | 250           |     |
| gi   640229117 | ref   WP_024829694.     | PGATLPATRF   | WRMPRETRSDG       | ----    | GRARVLIAT | Y       | ED             | DPFFYARSLAATL  | 250           |     |
| gi   518936109 | ref   WP_020091984.     | PGAALPATRF   | WRMPRETRSDG       | ----    | GSRVLIAT  | Y       | ED             | DPFFYARSLAATL  | 250           |     |
| gi   760075276 | ref   WP_043757989.     | PAASLPATGF   | WRMPRETRSD        | ----    | GSRVLIAT  | Y       | ED             | DPFFYARSLAATL  | 250           |     |
| gi   759662308 | ref   WP_043379914.     | PAASLPATGF   | WRMPRETRSD        | ----    | GSRVLIAT  | Y       | ED             | DPFFYARSLAATL  | 250           |     |
| gi   498368472 | ref   WP_010682628.     | TAASLPATSF   | WRMGRETRSD        | ----    | GRARVLIAT | Y       | ED             | DPFFYARSLAATL  | 250           |     |
| gi   497224411 | ref   WP_009538673.     | PPVMLPKTRL   | WRIRRASRQAP       | ----    | EAAARVAG  | T       | LE             | DPFFYARSLSLRL  | 265           |     |
| gi   589291345 | gb   AHK79488.1   _12   | PAHGLPTARI   | WRAPRATRADGS      | ----    | ATIRHTL   | E       | DPFFYARSLVDARI | 309            |               |     |
| gi   644125233 | ref   WP_025281955.     | PAHGLPTARI   | WRAPRATRADGS      | ----    | ATIRHTL   | E       | DPFFYARSLVDARI | 254            |               |     |
| gi   496218797 | ref   WP_008932834.     | RRQGLPTS     | AWRIDRATRADGR     | ----    | AAVRQTL   | I       | DPFFYVRSLLDTRI | 268            |               |     |
| gi   495659402 | ref   WP_008383981.     | PPVMLP       | ASAWRPRETRADPGTA  | ----    | VTIVDTL   | E       | DPFFYARSLITGTL | 263            |               |     |
| gi   687960265 | gb   KGE05197.1   _16   | PRQQLP       | RASIMWARSTQADRDTP | ----    | VTVQRTL   | E       | DPFFYRSLLQYRA  | 270            |               |     |
| gi   496312569 | ref   WP_009021747.     | PSTALP       | STGIWRVARRMPGAE   | ----    | GKPAKLE   | T       | LE             | DPFFYARSLIETTF | 297           |     |
| gi   495571757 | ref   WP_008296336.     | DAAAALPRT    | GIVRHRMPGAE       | ----    | ARPTRLQ   | T       | LE             | DPFFYARSLIKTEF | 273           |     |
| gi   908380581 | ref   WP_049751705.     | DPAPLP       | TALWGRRRIPSDTP    | ----    | EKARLIET  | F       | ED             | DPFFYARSLVATEV | 254           |     |
| gi   658524263 | ref   WP_029718812.     | PRQLP        | TT-LWRIGRTMRTEPGV | ----    | PAVVEQT   | L       | ED             | DPFFYARSMVRSGL | 249           |     |
| gi   332109922 | gb   EGT10550.1   _1    | PRQLP        | TT-LWRIGRTMRTEPGV | ----    | PAVVEQT   | L       | ED             | DPFFYARSMVRSGL | 202           |     |
| gi   760103377 | ref   WP_043785587.     | PRQLP        | TT-LWRIDRTMRTEPGV | ----    | PAFVEQT   | L       | ED             | DPFFYARSMVRSGL | 249           |     |
| gi   760129436 | ref   WP_043810804.     | PRQLP        | TT-LWRIDRTMRTEPGV | ----    | PALVEQT   | L       | ED             | DPFFYARSMVRSGL | 249           |     |
| gi   7416798   | dbj   BAA94047.1   _1-4 | PRQLP        | TT-LWRIDRTMRTEPGV | ----    | PAFVEQT   | L       | ED             | DPFFYARSMVRSGL | 372           |     |
| gi   75345570  | sp   P95619.1   CRIC_R  | PRQLP        | TT-LWRIGRTMRTEPGV | ----    | PALVEQT   | L       | ED             | DPFFYARSMVRSGL | 372           |     |
| gi   913634290 | gb   KNZ32951.1   _1    | PRQALP       | RT-LWRIGRTMRTEPGV | ----    | PATVTRT   | L       | ED             | DPFFYARSMVRSGL | 254           |     |
| gi   809277751 | ref   WP_046331236.     | ERVSURKT     | GWGIKRNMRSSEK     | TG      | ----      | IVELLNT | Y              | ED             | DPFFYARSLQSHL | 255 |
| gi   518258896 | ref   WP_019429104.     | PVQLPKT      | AWRIDRRMRSTQ      | ----    | AVRVHEQ   | L       | ED             | DPFFYQALLQFDY  | 253           |     |
| gi   518255752 | ref   WP_019425960.     | PVQNL        | SKT-GWRIDRRMRSTQ  | ----    | AVRVHEQ   | L       | ED             | DPFFYQALLQFDH  | 253           |     |
| gi   918152310 | gb   KOF08324.1   _1    | PVQNL        | SKT-GWRIDRRMRSAN  | ----    | AVRVQEQ   | L       | ED             | DPFFYQALLQFNF  | 253           |     |
| gi   61653243  | gb   AAX48196.1   _1-2  | PVQRLPKT     | GWRIDRRMRSEQ      | ----    | PVQVQEQ   | L       | ED             | DPFFYQALLQFDH  | 253           |     |
| * * * * *      |                         |              |                   |         |           |         |                |                |               |     |
| gi   350284778 | gb   AEQ27763.1   _1    | LDRPVT       | AVHESLSDRFRS      | RWVQHLL | LPYRMPRR  | ----    | 403            |                |               |     |
| gi   521992738 | ref   WP_020504009.     | LDRPVT       | AVHESLSDRFRS      | RWVQHLL | LPYRMPRR  | ----    | 301            |                |               |     |
| gi   557030915 | gb   ESQ08988.1   _1    | LDRPLQ       | AVHESLSDRFRS      | PVQHML  | LPYRMPRH  | ----    | 292            |                |               |     |
| gi   494353717 | ref   WP_007191968.     | QGRPIE       | AVHESLSDRFRS      | AWVQHLL | LPYRMPRR  | ----    | 292            |                |               |     |
| gi   570733543 | gb   AHF04706.1   _24   | QGRQAE       | AVHESLSDRFTS      | PWVQPLL | LPYRMPKR  | ----    | 312            |                |               |     |
| gi   760081160 | ref   WP_043763735.     | QGRQAE       | AVHESLSDRFTS      | PWVQPLL | LPYRMPKR  | ----    | 312            |                |               |     |
| gi   528190751 | gb   EYP01080.1   _43   | FGEKY        | TGFHESLCLDRFRS    | GWVQALL | LPFRMPRR  | ----    | 347            |                |               |     |

|                |                     |                                      |     |
|----------------|---------------------|--------------------------------------|-----|
| gi   748594904 | ref   WP_039853084. | FGEKVTGFHESLCLDRFRSGWVQALLPFRMPRR--  | 300 |
| gi   488815067 | ref   WP_002727473. | FGEEVTGFHESLCLDRFRFTGWVQALLPFRMPRR-- | 385 |
| gi   505094729 | ref   WP_015281831. | LGPVTVGHESLCLDRFRQGWVQMLLPFRMPRLA    | 289 |
| gi   754165669 | ref   WP_041786299. | AGDVTAIHESLCLDRFDSTWVQVLLPFRMPRLA    | 310 |
| gi   739596279 | ref   WP_037453842. | GSRPATAIHESLCLDRFRAGWVQAMLFFRMPR--   | 287 |
| gi   764363842 | ref   WP_044336870. | FGEDAQAVHESLGLGRFRSPVQSMPLPRMPR--    | 302 |
| gi   644239143 | ref   WP_025293539. | FGEDYQAVHESLGLGRFRSPVQSMPLPRMPR--    | 302 |
| gi   503035479 | ref   WP_013270455. | LGEACGVHESLGLRRLRSLPLVRAMLFFRMPR--   | 289 |
| gi   617472745 | gb KAI93218.1 _2-   | LGEPVHAMHESVLDLRFKRKRVQSLIGWEMPR--   | 375 |
| gi   737603811 | ref   WP_035574467. | YQDPTAVHESLSLVRFTRWVKLLLPFRMPRRA     | 287 |
| gi   648530966 | ref   WP_026222717. | RGETIHWNESLCLDRFANPLIRLMLPFRMPRRA    | 284 |
| gi   288897641 | gb ADC63477.1 _28   | LGRATSVEHESLCLDRFSTQWVKVLLPFRMPR--   | 375 |
| gi   760114352 | ref   WP_043796307. | LQRATSVEHESLCLDRFSTQWVKVLLPFRMPR--   | 287 |
| gi   494098690 | ref   WP_007039487. | LGEHATSVEHESLCLDRFSSWVTRTLLPFRMPRIA  | 291 |
| gi   75388571  | sp Q7X3G5.1 CRTC_T  | AGETATCVHESLCLDRFASPVVQMLPFRMPR--    | 376 |
| gi   390426908 | gb AFL73973.1 _35   | LGEPYTAMHESVCLDRFDSRWVQVLLPFRIPR--   | 336 |
| gi   752807498 | ref   WP_041446922. | LGEPYTAMHESVCLDRFDSRWVQVLLPFRIPR--   | 297 |
| gi   760074757 | ref   WP_043757486. | LGEPYTAMHESVCLDRFNSRWVQTLPPFRIPR--   | 305 |
| gi   918211006 | ref   WP_052348303. | LGEPYTAMHESVCLDRFNSRWVQTLPPFRIPR--   | 297 |
| gi   499982040 | ref   WP_011662758. | LGETATAMHESLCLDRFNSRWVQTLPPFRIPR--   | 305 |
| gi   493840365 | ref   WP_006787509. | FGPEVTAMHESLCLDRYSKWKVRSMLPFRMPR--   | 290 |
| gi   653037601 | ref   WP_027289289. | AGEPYRAMHESLSLTRFDTRIVRLMLPFRMPR--   | 314 |
| gi   519009821 | ref   WP_020165696. | LGEVHGVEHESLLELRFSGWVQMLLPFRMPRRS    | 310 |
| gi   518759539 | ref   WP_019916969. | LGEVHGVEHESLLELRFSGWVQMLLPFRMPRRS    | 306 |
| gi   495340016 | ref   WP_008064750. | LGEVHGVEHESLLELRFSSGWVQMLLPFRMPRRS   | 306 |
| gi   517223140 | ref   WP_018411958. | LGEVYRGVHESLLELRFSSGWVQMLLPFRMPRRR   | 308 |
| gi   889919304 | ref   WP_048861895. | DGEVYIAMHEALSMRRFVAPWVQAMLFFRMPR--   | 303 |
| gi   496441596 | ref   WP_009150441. | LGEPTAVHESLCLDRFAQPWVYRMLLPFRMPR--   | 384 |
| gi   146409846 | gb ABQ38352.1 _10   | GGEDVAVMHESLCLDRFKQPIVQAMLFFRMPR--   | 392 |
| gi   908659074 | ref   WP_049795525. | GGEDVAVMHESLCLDRFKQPIVQAMLFFRMPR--   | 299 |
| gi   365289544 | emb CCD93979.1 _1   | QGEDVAVMHESLCLDRFQMPVQAMLFFRMPRRA    | 394 |
| gi   41018902  | gb AAR98493.1 _10-  | HGEDVAVMHESLCLDRFQMPVQAMLFFRMPR--    | 392 |
| gi   653027709 | ref   WP_027279528. | LGEQTTLMHESLSLELRFMPVQAMLFFRMPRR--   | 302 |
| gi   499791021 | ref   WP_011471755. | FGEHATLMHESLCLDRFKMPVYQAMLFFRMPRR--  | 302 |
| gi   499823412 | ref   WP_011504146. | LGEPTLVHESLCLDRFRMPVYQAMLFFRMPRR--   | 302 |
| gi   499762149 | ref   WP_011442883. | LGERVTLMHESLCLDRFKMPVYQAMLFFRMPRR--  | 302 |
| gi   829076993 | ref   WP_047310044. | LGEKVTLMHESLCLDRFRMPVYQAMLFFRMPRR--  | 302 |
| gi   503269006 | ref   WP_013503667. | LGEKVTLMHESLCLDRFRMPVYQAMLFFRMPRR--  | 302 |
| gi   499470438 | ref   WP_011157078. | LGEKVTLVHESLCLDRFRMPVYQAMLFFRMPRR--  | 302 |
| gi   501486651 | ref   WP_012495141. | LGEKVTLVHESLCLDRFRMPVYQAMLFFRMPRR--  | 302 |
| gi   550975051 | ref   WP_022723265. | LGEKVTLMHESLCLDRFKLPVYQAMLFFRMPRR--  | 302 |
| gi   764538658 | ref   WP_044412067. | LGEKVTLMHESLCLDRFKLPVYQAMLFFRMPRR--  | 302 |
| gi   754113006 | ref   WP_041748751. | LGEKVTLMHESLCLDRFKLPVYQAMLFFRMPRR--  | 312 |
| gi   737680904 | ref   WP_035649991. | LGPVTLIHESLCLDRFKMPLVQAMLFFRMPR--    | 306 |
| gi   503405597 | ref   WP_013640258. | GGEPVAVHETLDCDRLVHPAVQFMLPFRMPRR--   | 305 |
| gi   657196689 | ref   WP_029312388. | DGERLDGVEHETLDDDRFTMPVYQAMLFFRMPRR-- | 307 |

|                |                         |          |       |       |       |     |     |     |     |    |     |     |     |       |     |    |     |    |     |    |     |    |    |     |     |
|----------------|-------------------------|----------|-------|-------|-------|-----|-----|-----|-----|----|-----|-----|-----|-------|-----|----|-----|----|-----|----|-----|----|----|-----|-----|
| gi   703385326 | ref   WP_033417843.     | CGERTTG  | VHESL | DLDR  | FRQP  | VVQ | WML | PF  | RMP | -- | 295 |     |     |       |     |    |     |    |     |    |     |    |    |     |     |
| gi   653032131 | ref   WP_027283892.     | LGERATA  | VHESL | DLDR  | FAHPS | WY  | AML | PF  | KV  | VP | --  | 301 |     |       |     |    |     |    |     |    |     |    |    |     |     |
| gi   378403832 | emb   CCG08948.1   _1   | HGETVRS  | VHESL | DLDR  | LTSR  | WVP | WLL | LP  | FR  | MP | RR  | 382 |     |       |     |    |     |    |     |    |     |    |    |     |     |
| gi   754176764 | ref   WP_041795395.     | HGETVRS  | VHESL | DLDR  | LTSR  | WVP | WLL | LP  | FR  | MP | RR  | 298 |     |       |     |    |     |    |     |    |     |    |    |     |     |
| gi   25989732  | gb   AAN75036.1   _12-  | AGEETRA  | VHESL | IDLDR | LKAG  | WV  | WPL | LP  | FR  | MP | RR  | 389 |     |       |     |    |     |    |     |    |     |    |    |     |     |
| gi   860504149 | ref   WP_048445338.     | CGEAYQP  | VHEAL | CLDR  | FS    | HL  | VR  | LML | PF  | FR | MP  | --  | 294 |       |     |    |     |    |     |    |     |    |    |     |     |
| gi   860474721 | ref   WP_048434413.     | CGEAYEP  | VHEAL | DLDR  | FRN   | PL  | VR  | AML | PF  | FR | MP  | --  | 294 |       |     |    |     |    |     |    |     |    |    |     |     |
| gi   501291381 | ref   WP_012333472.     | CGEAYEP  | VHEAL | CLDR  | FR    | HP  | PL  | VR  | LML | PF | FR  | MP  | --  | 294   |     |    |     |    |     |    |     |    |    |     |     |
| gi   860453591 | ref   WP_048427078.     | CGEAYQP  | VHESL | DC    | DR    | LTH | PL  | VR  | FML | PF | FR  | MP  | --  | 281   |     |    |     |    |     |    |     |    |    |     |     |
| gi   860560381 | ref   WP_048464709.     | CGEAYQP  | VHESL | DLDR  | LTH   | PL  | VR  | FML | PF  | FR | MP  | --  | 281 |       |     |    |     |    |     |    |     |    |    |     |     |
| gi   860527577 | ref   WP_048454269.     | CGEAVRPI | HESL  | DLDR  | LTH   | PL  | VR  | FML | PF  | FR | MP  | --  | 294 |       |     |    |     |    |     |    |     |    |    |     |     |
| gi   760871815 | dbj   BAQ48812.1   _1   | CGEAYEP  | VHESL | DLDR  | LTH   | PL  | VR  | FML | PF  | FR | MP  | --  | 281 |       |     |    |     |    |     |    |     |    |    |     |     |
| gi   373567336 | gb   EHP93308.1   _6-   | DGEAYQP  | VHESL | TR    | FR    | N   | PL  | VR  | LML | PF | FR  | MP  | RR  | 303   |     |    |     |    |     |    |     |    |    |     |     |
| gi   240009448 | gb   ACS40674.1   _4-   | DGEAYQP  | VHESL | TR    | FR    | N   | PL  | VR  | LML | PF | FR  | MP  | RR  | 294   |     |    |     |    |     |    |     |    |    |     |     |
| gi   218523206 | gb   ACK83791.1   _4-   | DGEAYQP  | VHESL | TR    | FR    | N   | PL  | VR  | LML | PF | FR  | MP  | RR  | 294   |     |    |     |    |     |    |     |    |    |     |     |
| gi   254269168 | emb   CAX25134.1   _4   | DGEAYQP  | VHESL | TR    | FR    | N   | PL  | VR  | LML | PF | FR  | MP  | RR  | 294   |     |    |     |    |     |    |     |    |    |     |     |
| gi   163663749 | gb   ABY31116.1   _2-   | DGEAYQP  | VHESL | TR    | FR    | N   | PL  | VR  | LML | PF | FR  | MP  | RR  | 297   |     |    |     |    |     |    |     |    |    |     |     |
| gi   494837541 | ref   WP_007563641.     | CGEPVRA  | VHESL | DLDR  | FRN   | PL  | VQ  | LML | PF  | FR | MP  | --  | 282 |       |     |    |     |    |     |    |     |    |    |     |     |
| gi   914802769 | ref   WP_050733395.     | AGEPVRA  | VHESL | DLDR  | FRN   | PL  | VQ  | LML | PF  | FR | MP  | --  | 282 |       |     |    |     |    |     |    |     |    |    |     |     |
| gi   657246165 | ref   WP_029357447.     | CGEPVRA  | MHESL | DLDR  | FRN   | P   | M   | V   | R   | L  | M   | L   | PF  | FR    | IP  | -- | 282 |    |     |    |     |    |    |     |     |
| gi   501276758 | ref   WP_012319776.     | CGEPVRA  | MHESL | DLDR  | FRN   | P   | M   | V   | R   | L  | M   | L   | PF  | FR    | IP  | -- | 282 |    |     |    |     |    |    |     |     |
| gi   640229117 | ref   WP_024829694.     | CGEPVRA  | MHESL | DLDR  | FRN   | P   | M   | V   | R   | L  | M   | L   | PF  | FR    | IP  | -- | 282 |    |     |    |     |    |    |     |     |
| gi   518936109 | ref   WP_020091984.     | GGEPVRA  | VHESL | DLDR  | FRN   | P   | M   | V   | R   | L  | M   | L   | PF  | FR    | IP  | -- | 282 |    |     |    |     |    |    |     |     |
| gi   760075276 | ref   WP_043757989.     | GGEPVRA  | MHESL | DLDR  | FRN   | P   | M   | V   | R   | L  | M   | L   | PF  | FR    | IP  | -- | 282 |    |     |    |     |    |    |     |     |
| gi   759662308 | ref   WP_043379914.     | GGEPVRA  | MHESL | DLDR  | FRN   | P   | M   | V   | R   | L  | M   | L   | PF  | FR    | IP  | -- | 282 |    |     |    |     |    |    |     |     |
| gi   498368472 | ref   WP_010682628.     | GGEPVRA  | MHESL | DLDR  | FRN   | P   | M   | V   | R   | L  | M   | L   | PF  | FR    | IP  | -- | 282 |    |     |    |     |    |    |     |     |
| gi   497224411 | ref   WP_009538673.     | AGEDATA  | VHESL | DM    | RR    | FT  | N   | P   | L   | V  | Q   | A   | M   | L     | PF  | FR | MP  | RR | 288 |    |     |    |    |     |     |
| gi   589291345 | gb   AHK79488.1   _12   | HGEKAVAF | HESL  | S     | L     | N   | R   | F   | E   | S  | P   | V   | Q   | L     | M   | L  | PF  | FR | MP  | RR | 343 |    |    |     |     |
| gi   644125233 | ref   WP_025281955.     | HGEKAVAF | HESL  | S     | L     | N   | R   | F   | E   | S  | P   | V   | Q   | L     | M   | L  | PF  | FR | MP  | RR | 288 |    |    |     |     |
| gi   496218797 | ref   WP_008932834.     | EGEPGLAF | HESL  | S     | L     | E   | R   | F   | E   | T  | T   | V   | Q   | L     | M   | L  | PF  | FR | MP  | RR | 302 |    |    |     |     |
| gi   495659402 | ref   WP_008383981.     | GGEPVTA  | VHESL | DLDR  | FA    | P   | W   | V   | Q   | A  | M   | L   | PF  | ----- | 291 |    |     |    |     |    |     |    |    |     |     |
| gi   687960265 | gb   KGE05197.1   _16   | LGEVRAV  | AHESL | DLDR  | F     | R   | R   | W   | V   | Q  | L   | L   | PF  | FR    | IP  | RR | 304 |    |     |    |     |    |    |     |     |
| gi   496312569 | ref   WP_009021747.     | GGEPGAGI | HESL  | S     | W     | Q   | R   | F   | E   | Q  | W   | V   | Q   | L     | L   | PF | FR  | MP | RR  | -- | 329 |    |    |     |     |
| gi   495571757 | ref   WP_008296336.     | GGETGTGI | HESL  | S     | M     | E   | R   | F   | E   | Q  | W   | V   | Q   | L     | L   | PF | FR  | MP | RR  | TT | 307 |    |    |     |     |
| gi   908380581 | ref   WP_049751705.     | DGRPLHAV | HESL  | DLDR  | FAS   | A   | W   | K   | P   | L  | L   | PF  | FR  | MP    | RR  | -- | 287 |    |     |    |     |    |    |     |     |
| gi   688524263 | ref   WP_029718812.     | LGEVTSV  | HET   | M     | L     | P   | R   | V   | I   | T  | L   | P   | V   | R     | I   | M  | L   | P  | W   | E  | R   | MP | RR | --  | 235 |
| gi   332109922 | gb   FGJ10550.1   _1-   | LGEVTSV  | HET   | M     | L     | P   | R   | V   | I   | T  | L   | P   | V   | R     | I   | M  | L   | P  | W   | E  | R   | MP | RR | --  | 235 |
| gi   760103377 | ref   WP_043785587.     | LGEVTSV  | HET   | M     | L     | P   | R   | V   | I   | T  | L   | P   | V   | R     | I   | M  | L   | P  | W   | E  | R   | MP | RR | --  | 283 |
| gi   760129436 | ref   WP_043810804.     | LGEVTSV  | HET   | M     | L     | P   | R   | V   | I   | T  | L   | P   | V   | R     | I   | M  | L   | P  | W   | E  | R   | MP | RR | --  | 283 |
| gi   7416798   | dbj   BAA94047.1   _1-4 | LGEVTSV  | HET   | M     | L     | P   | R   | V   | I   | T  | L   | P   | V   | R     | I   | M  | L   | P  | W   | E  | R   | MP | RR | --  | 406 |
| gi   75345570  | sp   P95619.1   CRTC_R  | LGEVTSV  | HET   | M     | L     | P   | R   | V   | I   | T  | L   | P   | V   | R     | I   | M  | L   | P  | W   | E  | R   | MP | RR | --  | 406 |
| gi   913634290 | gb   KNZ32951.1   _1-   | LGEAVES  | VHET  | L     | S     | P   | R   | L   | S   | P  | A   | V   | R   | F     | M   | L  | P   | W  | E   | R  | MP  | RR | -- | 286 |     |
| gi   809277751 | ref   WP_046331236.     | LGEVISM  | HET   | L     | N     | R   | L   | K   | S   | I  | V   | Q   | L   | M     | L   | P  | W   | E  | R   | MP | RR  | N  | -- | 288 |     |
| gi   518258896 | ref   WP_019429104.     | AGESLLAF | HET   | L     | S     | P   | R   | L   | S   | P  | V   | Q   | A   | M     | L   | P  | W   | E  | R   | MP | RR  | RR | -- | 287 |     |
| gi   518255752 | ref   WP_019425960.     | AGEPLLA  | FHET  | L     | S     | P   | R   | L   | S   | P  | V   | Q   | A   | M     | L   | P  | W   | E  | R   | MP | RR  | RR | -- | 287 |     |
| gi   918152310 | gb   KOF08324.1   _1-   | AGQLLA   | FHET  | L     | S     | P   | R   | L   | S   | P  | V   | Q   | A   | M     | L   | P  | W   | E  | R   | MP | RR  | RR | -- | 287 |     |

gi|61653243|gb|AAx48196.1|\_1-2      ACEPILAFHEITLSVPRIIVSPVYQAMLPEMPRRA    287  
..            .:\*:\*            :            :            :  
              .\*:\*            \*            :            :

PLEASE NOTE: Showing colors on large alignments is slow.

## 1. Importance of the N-terminal part of CrtC

In our previous study we have already shortly discussed the preliminary results on the importance of the N-terminal part of CrtC for the catalytic activity (Hiseni et al. 2011). In order to investigate this further, truncated (*Tr*- and *Rg*CrtC) and N-terminal point mutants (*Tr*CrtC) were constructed (Table S1). We have shown here that the activity of the truncated versions is fully retained (Figure 6, main text). It should be noted here that the truncated version of *Tr*CrtC shows a larger molecular weight (Figure S2, lane 2) compared to the native ‘cleaved’ form (Figure S2, lanes 3,4), which is due to the attached N-terminal His-Tag in all constructs that is cleaved off from the full length protein, resulting in a smaller protein.

**Table S1.** N-terminal mutants of *Rubrivivax gelatinosus* (*Rg*CrtC) and *Thiocapsa roseopersicina* (*Tr*CrtC) carotenoid 1,2-hydratase.

| <b>Name</b>              | <b>Mutation</b>                      |
|--------------------------|--------------------------------------|
| <i>Rg</i> CrtC truncated | <i>Rg</i> CrtC without first 45 AAs  |
| <i>Tr</i> CrtC truncated | <i>Tr</i> CrtC without first 57 AAs  |
| <i>Tr</i> CrtC S58V      | <i>Tr</i> CrtC bearing mutation S58V |
| <i>Tr</i> CrtC S58Q      | <i>Tr</i> CrtC bearing mutation S58Q |

Apart from expression levels, the activities of crude cell extracts of the N-terminal constructs were measured with lycopene as substrate. Since crude cell extracts were used, the results cannot be quantitated. However, in combination with the expression levels as shown in Figure S2, indicative conclusions can be drawn. As stated in our previous study, the N-terminus is not important for catalytic activity (Hiseni et al. 2011). This again was proven here, as the truncated *Rg*- as well as *Tr*CrtC were active. Furthermore, although the introduction of N-terminal point mutations did affect the cleavage rate of the N-terminal part, it did not affect the activity of *Tr*CrtC.



**Figure S2.** SDS-PAGE (10%) analysis of expression of N-terminal mutants from *T. roseopersicina* CrtC (*TrCrtC*). M, Precision plus protein standard (BioRad). First lane of each sample shows cells before induction with 0.1 mM IPTG and the second lane shows cells after overnight expression at 25°C. 1, *TrCrtC* wild type; 2, *TrCrtC* truncated; 3, *TrCrtC* S58V; 4, *TrCrtC* S58Q.

Full length protein = 44 kDa, truncated protein w/o His-tag = 38 kDa, truncated protein with His-tag = 39 kDa.

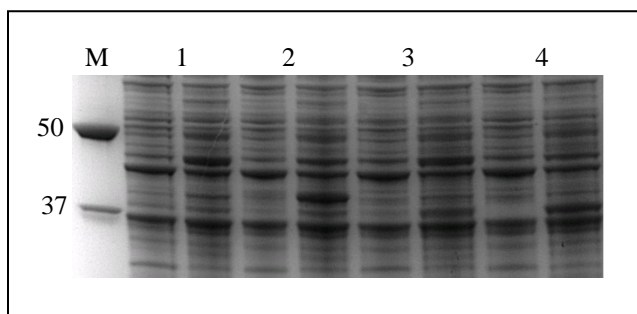

Although the reason for the truncation is still unknown, and the N-terminal region is not involved in the catalytic activity, we did explore this phenomenon a bit further. The cleavage site was determined by MS analysis, and appeared between S57 and S58. To determine whether the truncation of recombinant *TrCrtC* was processed by *E. coli* endogenous proteases or the enzyme itself, two mutants at the first amino acid after cleavage were produced. The S58 position was modified by substitutions with valine (same size, different chemical features) or glutamine (different size, same chemical features), which are no targets for known *E. coli* proteases. All resulting proteins were cleaved, but at a different rate. It seems that the cleavage rate increased in the order of wild type < S58V < S58Q. This conclusion is based on the fact that in the wild type sample in Figure S2 mainly the 44 kDa band is visible (lane 1). In the S58V mutant about the same amount of both, the 38- as well as the 44 kDa bands could be detected (lane 3), while in the S58Q mutant mainly the 38kDa band could be identified (lane 4). These differences in cleavage rate might be explained by the fact that the substitution of an amino acid by a larger or more hydrophobic amino acid could result in conformational changes which promote the processing activity, either by host proteases or through self-cleavage. Since this truncation was not the focus of this study, we did not pursue this any further. Nevertheless, additional experiments are needed to get more insight into this occurrence. For example, by expressing larger amounts of the corresponding proteins, and quickly purifying them, one could follow the change of the protein size in time. With the wild type *TrCrtC*, we have already seen that even though the purified enzyme consisted of both sizes proteins, after few days of storage, the 44 kDa could not be detected anymore, pointing towards self-cleavage (Hiseni et al. 2011), which is not disturbed by the mutations prepared in this study.

## 2. Homology model of CrtC

In order to investigate which one of the fully conserved residues could be involved in the catalytic hydration reaction, we tried to build a 3D structure model of *TrCrtC*. The CrtC secondary structure prediction was carried out with the program PolyView 2D (Porollo et al. 2004). Then the SWISS-MODEL program was used to model the structure of *TrCrtC* (Arnold et al. 2006). All programs were used from their respective website, using the default settings.

**Figure S3.** A homology model of CrtC from *T. roseopersicina* based on the crystal structure of a putative AttH (PDB id: 2ICH) from *Nitrosomonas europaea*. The ribbon diagrams depict front (left-hand side) and back (right-hand side) view of CrtC. The structure is color-coded from the N-terminus (blue) to the C-terminus (red).

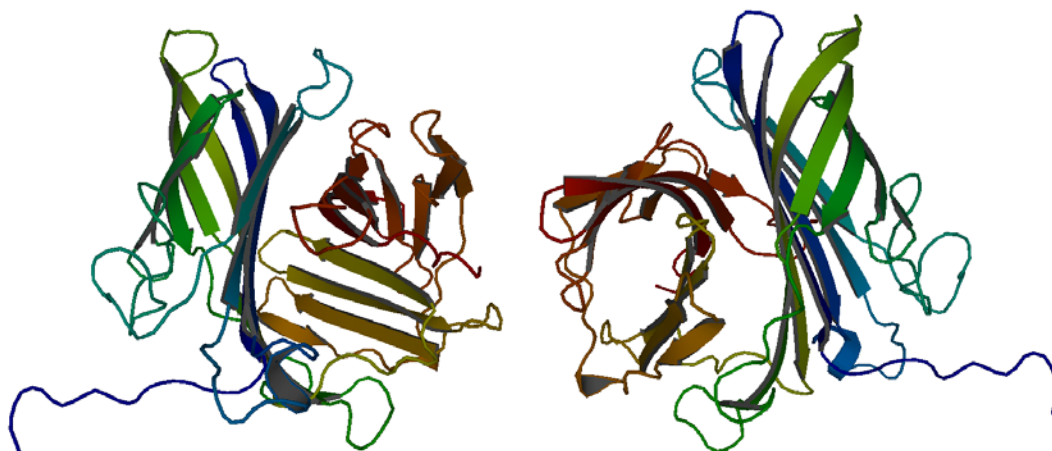

The homology model was based on the only known 3D structure (PDB 2ICH) that showed some sequence identity (15.4%) to the CrtC (Figure S3), which is generally regarded as too low to build a good model. Modelled residue range was between 95 and 342 (QMEAN Z-Score: -6.054). The homologue is the putative AttH protein from *Nitrosomonas europaea* (Chiu et al. 2010). It belongs to a protein family of unknown function (DUF2006), which has remote similarity to the family PF07143 encompassing carotenoid 1,2-hydratases. The topology of the CrtC model structure shows similarity to lipocalins, proteins that bind and transport small hydrophobic molecules (Flower 1996). The lipocalin fold is typically formed by a large, twisted beta-sheet that closes in the back to form a central, internal, ligand-binding cavity. This folding motif is frequently found in porins, transmembrane proteins or in general in proteins that bind hydrophobic ligands/substrates (LaLonde et al. 1994).

**Figure S4.** CrtC conserved residues. Ribbon diagram of *Tr*CrtC with marked regions that contain highly conserved amino acid residues. The sequence motifs, which correspond to those regions, are shown in boxes (I – VI). N and C indicate N- and C-terminus, respectively.

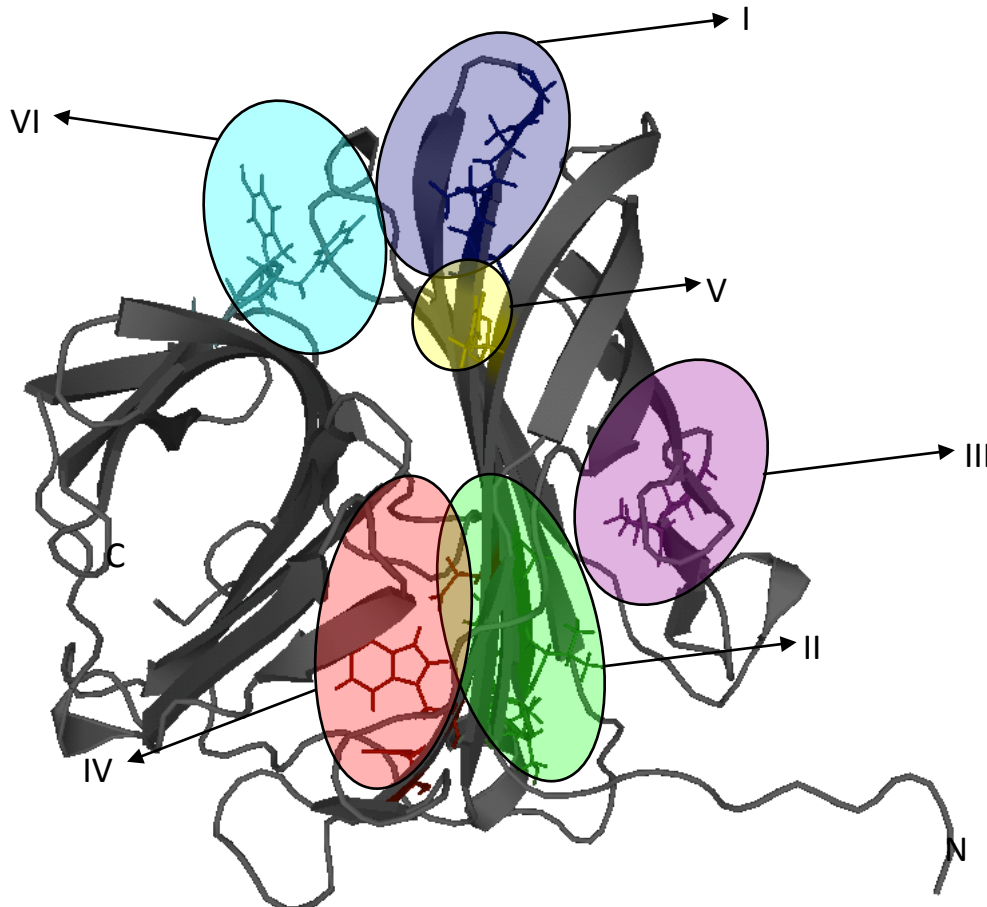

|                      | I     | II       | III  | IV   | V      | IV | VI  |
|----------------------|-------|----------|------|------|--------|----|-----|
| <i>Rg</i> CrtC ..... | SDDG. | GSVFSP.Y | GPS. | H.W. | H.Y.D. |    | PFY |
| <i>Tr</i> CrtC ..... | SDDG. | GSVFSP.Y | GPS. | H.W. | H.Y.D. |    | PFY |
| <i>Br</i> CrtC ..... | SDDG. | GSVFSP.Y | GPS. | H.W. | D.Y.D. |    | PFY |
| <i>Rr</i> CrtC ..... | SDDG. | GSVFSP.Y | GPS. | H.W. | H.Y.D. |    | PFY |
| <i>Rp</i> CrtC ..... | SDDG. | GSVFSP.Y | GPS. | H.W. | H.Y.D. |    | PFY |
| Fos13CrtC.....       | SDDG. | GSVFSP.Y | GPS. | H.W. | H.Y.D. |    | PFY |
| Fos06CrtC.....       | SDDG. | GSVFSP.Y | GPS. | H.W. | H.Y.D. |    | PFY |

We visualized the conserved residues onto the model to investigate if there is any relationship between the conserved regions and specific locations in the homology model of CrtC (Figure S4). Six striking sequence motifs were selected (I – VI) and the results show that, indeed, most of the highly conserved residues that were found across all (putative) CrtC's (Figure S1) are located either at the bottom or upper part of the cavity, with one motif (III) located outside the cavity. From a catalytic point of view, the amino acids located in regions IV and V, i.e. aspartic acid (D), tyrosine (Y) and histidine (H), are most probably involved in the catalytic hydration, as these amino acids are commonly involved as active residues in acid-base type catalyzed reactions in the active sites of enzymes (Bartlett et al. 2002). Furthermore, in this model they are all aligned and in close distance to each other (Figure S5), which is important for the contact with the substrate.

**Figure S5.** View of the potential active site of *Tr*CrtC. The conserved residues H237 (yellow), W239 (red), Y264 (blue) and D266 (green) are shown as sticks, with hydrogen bond as yellow dots (region IV).

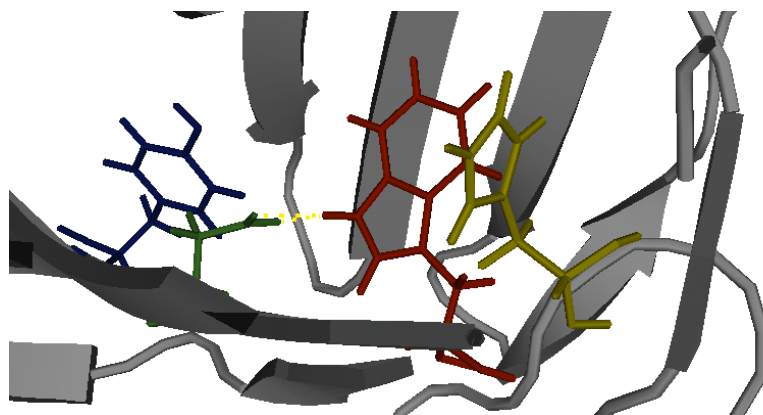

Although the model is based on very low homology, this structure is in agreement with our final hypothesis, where Y266 could make a bond to D268 through a water molecule, and H239 is in H-bridging distance (Figure S5), so all amino acids are correctly placed to assume their hypothetical role (Figure 8, main text). Interestingly, according to the homology model, the residues H264 (*Rg*) and H262 (*Tr*), which mutation to Ala does not impair the activity of the enzyme so much, are located away (region V) from the potential active site residues. This observation further allows our hypothesis that region IV is the active site of CrtC. On the other hand, the three totally conserved hydrophobic residues proline, phenylalanine and tyrosine in region VI might play the role of attracting the hydrophobic substrate and placing it in the right position. The highly conserved mainly hydrophobic amino acids in region II, which are located close to potential active site residues in region IV, might play a role in stabilization of the substrate during catalytic activity.

## Conclusion

The homology model built for this study is merely a working model, given the limited level of sequence identity. However, the position of key residues correspond to the activity data of the mutants and allows our hypothesis on the hydration mechanism of CrtC. Due to this fact that the preserved active site residues do end up in close proximity to each other (see figure S5), we consider this model to provide a good basis for future studies, although a real crystal structure is of the utmost importance to confirm our hypothesis.

## Acknowledgements

We thank Jan van Leeuwen (Groningen University) for making the CrtC models.

## References

- Arnold K, Bordoli L, Kopp J, Schwede T (2006) The SWISS-MODEL workspace: a web-based environment for protein structure homology modelling. *Bioinformatics* 22(2):195-201. doi:10.1093/bioinformatics/bti770
- Bartlett GJ, Porter CT, Borkakoti N, Thornton JM (2002) Analysis of catalytic residues in enzyme active sites. *J Mol Biol* 324(1):105-121. doi:10.1016/S0022-2836(02)01036-7
- Chiu H-J, Bakolitsa C, Skerra A, Lomize A, Carlton D, Miller MD, Krishna SS, Abdubek P, Astakhova T, Axelrod HL, Clayton T, Deller MC, Duan L, Feuerhelm J, Grant JC, Grzechnik SK, Han GW, Jaroszewski L, Jin KK, Klock HE, Knuth MW, Kozbial P, Kumar A, Marciano D, McMullan D, Morse AT, Nigoghossian E, Okach L, Paulsen J, Reyes R, Rife CL, van den Bedem H, Weekes D, Xu Q, Hodgson KO, Wooley J, Elsliger M-A, Deacon AM, Godzik A, Lesley SA, Wilson IA (2010) Structure of the first representative of Pfam family PF09410 (DUF2006) reveals a structural signature of the calycin superfamily that suggests a role in lipid metabolism. *Acta Crystallogr, Sect F: Struct Biol Cryst Commun* 66(10):1153-1159. doi:10.1107/S1744309109037749
- Flower DR (1996) The lipocalin protein family: Structure and function. *Biochem J* 318(1):1-14. doi:10.1042/bj3180001
- Hiseni A, Arends IWCE, Otten LG (2011) Biochemical characterization of the carotenoid 1,2-hydratases (CrtC) from *Rubrivivax gelatinosus* and *Thiocapsa roseopersicina*. *Appl Microbiol Biotechnol* 91(4):1029-1036. doi:10.1007/s00253-011-3324-1
- LaLonde JM, Bernlohr DA, Banaszak LJ (1994) The up-and-down beta-barrel proteins. *FASEB J* 8(15):1240-7.
- Porollo AA, Adamczak R, Meller J (2004) POLYVIEW: A flexible visualization tool for structural and functional annotations of proteins. *Bioinformatics* 20(15):2460-2462. doi:10.1093/bioinformatics/bth248
